1 **Simultaneous measurement of chromatin accessibility, DNA methylation, and**  
2 **nucleosome phasing in single cells**

3 Sebastian Pott

4 University of Chicago, Department of Human Genetics, Chicago, IL, United States

5

6 Correspondence:

7 Department of Human Genetics

8 University of Chicago

9 920 East 58<sup>th</sup> Street

10 Chicago, IL, 60637

11 Fax: (773) 834-0505

12 E-mail: [spott@uchicago.edu](mailto:spott@uchicago.edu)

13

14

15

16

17

18

19 Running title: Chromatin organization in single cells

20 Keywords: single cell genomics, chromatin organization, DNA methylation, NOMe-seq

## 1 **Abstract**

2 Gaining insights into the regulatory mechanisms that underlie the transcriptional variation observed  
3 between individual cells necessitates the development of methods that measure chromatin  
4 organization in single cells. Here I adapted *Nucleosome Occupancy* and *Methylome*-sequencing  
5 (NOMe-seq) to measure chromatin accessibility and endogenous DNA methylation in single cells  
6 (scNOMe-seq). scNOMe-seq recovered characteristic accessibility and DNA methylation patterns  
7 at DNase hypersensitive sites (DHSs). An advantage of scNOMe-seq is that sequencing reads are  
8 sampled independently of the accessibility measurement. scNOMe-seq therefore controlled for  
9 fragment loss, which enabled direct estimation of the fraction of accessible DHSs within individual  
10 cells. In addition, scNOMe-seq provided high resolution of chromatin accessibility within  
11 individual loci which was exploited to detect footprints of CTCF binding events and to estimate the  
12 average nucleosome phasing distances in single cells. scNOMe-seq is therefore well-suited to  
13 characterize the chromatin organization of single cells in heterogeneous cellular mixtures.

14

15

16

17

18

19

20

21

22

## 1 Introduction

2 Extensive transcriptional variation between individual cells has been observed using single cell  
3 RNA-seq. These data facilitate identification of functional subpopulations in seemingly  
4 homogeneous cell populations (Shalek et al. 2014), or characterization of the cellular composition  
5 of complex tissues (Jaitin et al. 2014; Treutlein et al. 2014; Macosko et al. 2015). To gain  
6 mechanistic insights into regulatory features that underlie cellular heterogeneity it is essential to  
7 measure chromatin organization in individual cells. A number of methods that map chromatin  
8 organization in populations of cells have been adapted for single cells, including ATAC-seq  
9 (Cusanovich et al. 2015; Buenrostro et al. 2015b), DNase-seq (Jin et al. 2015), methylome  
10 sequencing (Smallwood et al. 2014; Farlik et al. 2015), and ChIP-seq (Rotem et al. 2015).  
11 Interpretation of these data in single cells is complicated because of the near binary and extremely  
12 sparse signal (Cusanovich et al. 2015; Buenrostro et al. 2015b; Maurano and Stamatoyannopoulos  
13 2015). *Nucleosome Occupancy and Methylome-sequencing* (NOMe-seq) (Kelly et al. 2012)  
14 employs the GpC methyltransferase (MTase) from *M. CviPI* to probe chromatin accessibility (Kelly  
15 et al. 2012; Kilgore et al. 2007). The GpC MTase methylates cytosines in GpC dinucleotides in  
16 non-nucleosomal DNA *in vitro*. Combined with high-throughput bisulfite sequencing this approach  
17 has been used to characterize nucleosome positioning and endogenous methylation in human cell  
18 lines (Kelly et al. 2012; Taberlay et al. 2014) and in selected promoters of single yeast cells (Small  
19 et al. 2014). NOMe-seq data have several unique features that are advantageous considering the  
20 challenges associated with single cell measurements (**Fig. 1 a**). First, NOMe-seq simultaneously  
21 measures chromatin accessibility (through GpC methylation) and endogenous CpG methylation.  
22 Chromatin accessibility indicates whether a putative regulatory region might be utilized in a given  
23 cell (ENCODE Project ConsortiumThe ENCODE Project Consortium 2012), while endogenous  
24 DNA methylation in regulatory regions has been connected to a variety of regulatory processes  
25 often associated with repression (Schübeler 2015). The ability to combine complementary assays  
26 within single cells is essential for a comprehensive genomic characterization of individual cells

1 since each cell represents a unique biological sample which is almost inevitably destroyed in the  
2 process of the measurement. Second, each sequenced read might contain several GpCs which  
3 independently report the accessibility status along the length of that read. NOME-seq therefore  
4 captures additional information compared to purely count-based methods, such as ATAC-seq and  
5 DNase-seq, which increases the confidence associated with the measurements and allows detection  
6 of footprints of individual transcription factor (TF) binding events in single cells. Third, the DNA is  
7 recovered and sequenced independently of its methylation status, which is a pre-requisite to  
8 distinguish between true negatives (i.e. closed chromatin) and false negatives (i.e. loss of DNA)  
9 when assessing accessibility at specified locations in single cells. This is especially important in  
10 single cells where allelic drop-out is pervasive. In single cells, NOME-seq can therefore measure the  
11 fraction of accessible regions among a set of covered, pre-defined genomic locations. In this proof-  
12 of-principle study, I showed that NOME-seq, which previously had only been performed on bulk  
13 samples (Kelly et al. 2012; Taberlay et al. 2014), can be performed on single cells. In addition to  
14 endogenous methylation at CpG dinucleotides, single cell NOME-seq (scNOME-seq) measured  
15 chromatin accessibility at DHSs and TF binding sites in individual cells, and detected footprints of  
16 CTCF binding at individual loci. Finally, the average phasing distance between nucleosomes within  
17 individual cells can also be estimated from scNOME-seq data.

18

## 19 **Results**

20 To adapt the NOME-seq protocol (Kelly et al. 2012; Miranda et al. 2010) to single cells, individual  
21 nuclei were first incubated with GpC MTase and then sorted into wells of a 96-well plate using  
22 fluorescence-activated cell sorting (FACS) (**Fig. 1b and Figure 1 – figure supplement 1**). DNA  
23 from isolated nuclei was subjected to bisulfite conversion and sequencing libraries were prepared  
24 using a commercial kit for amplification of low amounts of bisulfite-converted DNA (**Methods**). To  
25 assess the feasibility and performance of NOME-seq in single cells, I used the well-characterized

1 cell lines GM12878 and K562. The scNOME-seq datasets in this study represent 19 individual  
2 GM12878 cells and 11 individual K562 cells. The set of GM12878 cells included seven control  
3 cells that were not treated with GpC MTase (**Figure 1– figure supplement 2**). Each GpC MTase-  
4 treated library was sequenced to at least 16 M individual reads (**Methods**). Reads were aligned to  
5 the human genome using the aligner Bismark (Krueger et al. 2012) and, after removal of duplicate  
6 reads, between 2.5M and 5M reads were retained per library (**Supplementary file 1**). On average  
7 6,679,864 (2.9%) of all cytosines in GpCs and 1,291,180 (3.6%) of all cytosines in CpGs were  
8 covered per cell (**Figure 2– figure supplement 1 and Supplementary file 1**).

9

#### 10 **scNOME-seq accurately detected accessible chromatin at DNaseI hypersensitive sites**

11 To test whether the GpC methylation observed in GpC MTase treated samples (**Figure 2– figure**  
12 **supplement 1**) captured known chromatin accessibility patterns, I focused on DNaseI  
13 hypersensitive sites (DHSs) that were previously identified in GM12878 and K562 cell lines  
14 (ENCODE Project ConsortiumThe ENCODE Project Consortium 2012). DHSs were associated  
15 with strong enrichment of GpC methylation, both in data from pooled and individual GM12878  
16 (**Figure 2 a, b, Figure 2– figure supplement 2**) and K562 cells (**Figure 2– figure supplement 3,**  
17 **4**). Conversely, endogenous CpG methylation decreased around the center of the DHSs in  
18 agreement with previous reports (Stadler et al. 2011; Ziller et al. 2014) (**Figure 2 a and Figure 2–**  
19 **figure supplement 3**). These data show that scNOME-seq detected chromatin accessibility at  
20 DHSs. To assess how many of the DHSs regions were covered in a single cell, I first filtered DHSs  
21 that contained GpC dinucleotides within their primary sequence and thus could be theoretically  
22 detected by NOME-seq. The frequent occurrence of GpC di-nucleotides renders the majority (>  
23 85%) of DHSs detectable by NOME-seq (**Figure 2– figure supplement 5, 6**). Of the theoretically  
24 detectable DHSs, 10.6% (20388/191566) and 17.3% (33182/191598) had 1 or more GpCs covered  
25 and, using a more stringent criterion, 5.2% (9083/174896) and 9.5% (16608/174828) were covered

1 at 4 or more GpCs in individual GM12878 cells and K562 cells, respectively (**Fig. 2 c**). Chromatin  
2 accessibility signal can vary along the length of a given DHSs due to binding of transcription  
3 factors (Neph et al. 2012) and the specific position of a GpC within a DHS will thus affect its  
4 chance of being methylated. To account for this variability and to obtain more robust estimates of  
5 GpC methylation only DHSs with at least 4 covered GpC were used for the subsequent analyses and  
6 referred to as ‘covered DHSs’.

7 In single cells, the average GpC methylation at covered DHSs was strongly correlated with the  
8 observed DNaseI accessibility at these sites in bulk populations (**Fig. 2 d, Figure 2 –figure**  
9 **supplement 7, 8**). The opposite trend was observed for endogenous CpG methylation which was  
10 lowest for DHSs with the highest DNaseI accessibility (**Figure 2 –figure supplement 7**). The  
11 correlation between GpC methylation and DNaseI accessibility was lower for scNOME-seq data  
12 compared to bulk NOME-seq data in the same cell line (**Figure 2 –figure supplement 8**). At the  
13 level of individual sites the distribution of GpC methylation suggested that around 50% of the  
14 covered DHS showed less than 25% GpC methylation in individual cells (**Figure 2 –figure**  
15 **supplement 9**). To estimate the proportion of covered DHSs that were concurrently accessible in a  
16 single cell I applied a fixed threshold of 40% GpC methylation above which sites were considered  
17 accessible (**Methods**). At this GpC methylation threshold 32-44% and 26-37% of all covered DHSs  
18 were determined to be accessible in single GM12878 and K562 cells, respectively. As expected  
19 these results depended to some degree on the cutoffs used for GpC methylation and the number of  
20 required GpCs per DHS. However, even under the most lenient conditions less than 50% of DHSs  
21 were accessible in individual cells (**Figure 2 –figure supplement 10**). Grouping the DHSs based on  
22 DNaseI accessibility in bulk samples, confirmed that the degree of DNaseI accessibility related  
23 closely to the frequency of DHS accessibility in single cells (**Fig. 2 e**). This analysis leveraged the  
24 NOME-seq-specific property that the DNA sequence is recovered independently of its accessibility  
25 status. It provided direct evidence for the notion that the degree of DNaseI accessibility observed in  
26 DNase-seq of bulk samples reflects the frequency with which a region is accessible in individual

1 cells. Consequently, chromatin accessibility between cells is less variable at regions with high  
2 DNaseI accessibility in bulk samples (**Figure 2 –figure supplement 11**). Correspondingly,  
3 correlation of GpC methylation between individual cells is stronger at DHS loci compared to  
4 randomized locations (**Figure 2 –figure supplement 12**).

### 5 **scNOME-seq captured characteristic chromatin organization associated with transcription**

6 Chromatin accessibility and endogenous methylation show characteristic patterns at gene promoters  
7 and within gene bodies (Schübeler 2015; ENCODE Project ConsortiumThe ENCODE Project  
8 Consortium 2012). To test whether these features can be observed in scNOME-seq data, I first  
9 plotted the average GpC and CpG methylation around transcription start sites (TSS). The average  
10 GpC methylation showed the expected increase of chromatin accessibility directly upstream of the  
11 TSS (**Fig. 3 a, Figure 3 – figure supplement 1**). In contrast, and as expected, the endogenous CpG  
12 methylation decreased towards the TSS (**Fig. 3 b**). To visualize the distribution of CpG methylation  
13 throughout entire gene loci, I plotted the aggregated CpG methylation across regions containing the  
14 entire gene body and 50 kb upstream and 50 kb downstream of each gene (**Fig. 3 c, Figure 3 –**  
15 **figure supplement 1**). Endogenous methylation was specifically reduced at the narrow promoter  
16 region and gradually increased throughout the gene body. Downstream of the transcription end site  
17 (TES) the average level CpG methylation level fell back to the non-genic background level.  
18 Endogenous CpG methylation is typically increased within highly expressed genes (Schübeler  
19 2015). This trend was clearly apparent in the single cell data where gene body methylation was  
20 highest in highly expressed genes (**Fig. 3 d, Figure 3 –figure supplement 1**). Correspondingly, in  
21 promoter regions (-500bp to +150bp) chromatin accessibility (GpC methylation) increased with the  
22 transcript level of the adjacent gene (**Fig. 3 e, Figure 3 –figure supplement 2**). In contrast to  
23 chromatin accessibility, endogenous methylation was lowest in promoters of genes with high  
24 transcript levels (**Fig. 3 f**). These data show that scNOME-seq recapitulated known characteristics of  
25 chromatin accessibility and endogenous methylation at gene promoters and within gene bodies.

## 1 **GpC methylation and endogenous CpG methylation data separated individual GM12878 and** 2 **K562 cells**

3 A potentially powerful application for single cell genomic approaches is the label-free classification  
4 of single cells from heterogeneous mixtures of cells solely based on the measured feature  
5 (Cusanovich et al. 2015; Buenrostro et al. 2015a; Jaitin et al. 2014; Macosko et al. 2015). Of note,  
6 using a union set of DHSs from both cell types was sufficient to classify individual GM12878 and  
7 K562 cells into their respective cell types based on GpC methylation (**Fig. 4 a, Figure 4 –figure**  
8 **supplement 1**). While this assessment might have been influenced in part by the separate  
9 processing of the cell types, both cell types showed preferential enrichment of GpC methylation at  
10 their respective DHSs compared to DHSs identified in the other cell type (**Fig. 4 b**). Similar to GpC  
11 methylation, endogenous CpG methylation at multiple sets of genomic features was sufficient to  
12 separate the cells into the respective cell types (**Fig. 4 c, Figure 4 –figure supplement 1**).

## 13 **Detection of footprints of CTCF binding at individual loci in single cells**

14 To examine in detail whether scNOME-seq captures features of chromatin accessibility that are  
15 specifically associated with transcription factor binding, I analyzed scNOME-seq data at  
16 transcription factor binding sites (TFBS). The average GpC methylation around CTCF ChIP-seq  
17 peaks (ENCODE Project ConsortiumThe ENCODE Project Consortium 2012) in single cells  
18 recapitulated the accessibility previously observed in NOME-seq bulk samples (Kelly et al. 2012):  
19 Accessibility increased strongly towards the CTCF binding sites while the location of the CTCF  
20 motif at the center of the region showed low accessibility suggesting that CTCF binding protected  
21 from GpC MTase activity and thus creating a footprint of a CTCF binding event, both when  
22 averaged across data from all single cells (**Fig. 5 a and Figure 5 – figure supplement 1**) and in  
23 individual cells (**Fig. 5 b and Figure 5 – figure supplement 2**). In contrast, endogenous CpG  
24 methylation was generally depleted around the center of CTCF binding sites (**Fig. 5 a and Figure 5**  
25 **– figure supplement 1**). Similar accessibility profiles, albeit less pronounced compared to CTCF,



1 were observed for additional transcription factors, for example EBF1 and PU.1 (**Figure 5 – figure**  
2 **supplement 3**). These analyses provided evidence that, in aggregate, scNOME-seq detected  
3 chromatin accessibility characteristic of CTCF binding in single cells. To test whether scNOME-seq  
4 data detected CTCF footprints at individual motifs loci, GpC methylation at motifs within CTCF  
5 ChIP-seq peaks was compared to the GpC methylation level in the regions flanking each motif (**Fig.**  
6 **5 c**). On average, two-thirds of CTCF motif instances within these accessible regions showed no  
7 GpC methylation, suggesting that CTCF binding prevented the GpC MTase from methylating the  
8 cytosines within the binding motif and thus creating a footprint (**Fig. 5 d and f**). Of note, motifs  
9 associated with a footprint had significantly higher scores than motifs without a footprint suggesting  
10 that the motif score is a strong determinant of CTCF binding within these accessible regions (**Fig. 5**  
11 **e, g and Figure 5 – figure supplement 4**). Of note, the CTCF footprints could be observed at  
12 individual loci within individual cells and were shared across cells (**Figure 5 h and Figure 5 –**  
13 **figure supplement 5**).

14

#### 15 **Estimating nucleosome phasing in single cells**

16 The pattern of GpC methylation adjacent to CTCF sites suggested that scNOME-seq also detected  
17 the well-positioned nucleosomes flanking these regions (**Fig. 5 a**) (Kelly et al. 2012). This  
18 observation was confirmed by the oscillatory distribution of the average GpC and CpG methylation  
19 around locations of well-positioned nucleosomes identified from MNase-seq data (ENCODE  
20 Project ConsortiumThe ENCODE Project Consortium 2012) (**Fig. 6 a**). While nucleosome core  
21 particles are invariably associated with DNA fragments of 147 bp, nucleosomes are separated by  
22 linker DNA of varying lengths, resulting in different packaging densities between cell types and  
23 between genomic regions within a cell (Valouev et al. 2011; Schones et al. 2008). To determine  
24 whether scNOME-seq data can be used to measure the average linker length, average distances  
25 between nucleosome midpoints in single cells (phasing distances) were estimated by correlating the

1 methylation status between pairs of cytosines in GpC di-nucleotides at offset distances from 3 bp to  
2 400 bp (**Fig. 6 c, d and Figure 6 – figure supplement 1, 2**). The estimated phases fell between 187  
3 bp and 196 bp (mean = 196.7 bp) in GM12878 cells, and between 188 bp and 200 bp (mean = 194.2  
4 bp ) in K562 cells (**Fig. 6 e**). These estimates are in general agreement with phase estimates derived  
5 from MNase-seq data in human cells (Valouev et al. 2011). In addition, estimated phasing distances  
6 varied within individual cells depending on the chromatin context, similar to observation from bulk  
7 MNase-seq data (Valouev et al. 2011) (**Fig. 6 f**).

## 8 **Discussion**

9 In this study, I demonstrated that scNOME-seq simultaneously measures chromatin accessibility by  
10 GpC methylation as well as endogenous CpG and DNA methylation in single cells. scNOME-seq  
11 detected chromatin accessibility at DHSs and TFBS and, in aggregate, these data recapitulated  
12 NOME-seq data obtained from bulk cells (Kelly et al. 2012). scNOME-seq data also detected  
13 footprints of CTCF binding, and was used to estimate nucleosome phasing distances.

14 Similar to other single cell genomic methods, scNOME-seq relies on annotations obtained from bulk  
15 measurements ((Cusanovich et al. 2015; Buenrostro et al. 2015b; Smallwood et al. 2014; Farlik et  
16 al. 2015). A limitation of single cell genomic methods is their sparse coverage which leads to high  
17 allelic drop-out. For methods in which the signal is based on counting the sequenced fragments,  
18 such as ATAC-seq and DNase-seq, this poses a challenge since true negatives at a specific location  
19 cannot be distinguished from false negatives that are a consequence of read loss. Compared to these  
20 methods, scNOME-seq has the unique advantage, that reads are recovered independently of the  
21 signal and allelic drop-out events therefore can be distinguished from closed or inaccessible  
22 chromatin configurations. The frequency of accessible sites in the population of DHSs can be  
23 estimated. Using this approach only about 30-50 % of DHSs detected in the population were found  
24 accessible in a single cell, depending on the thresholds chosen to call a site accessible. While this  
25 assessment would have been possible using bulk NOME-seq data, scNOME-seq offers important

1 possibilities for future applications. For example, to compare accessibility across multiple loci  
2 within a single cell and the use of heterogeneous cellular mixtures as input material.

3 As expected, the chance of a covered DHS to being open or closed is not equally distributed across  
4 all DHSs from the population. Instead, DHSs with strong DNaseI accessibility showed a higher  
5 frequency of accessibility in single cells compared to those sites with low DNaseI accessibility in  
6 the population (**Fig. 2 e**) suggesting that the peak height is indeed directly related to the frequency  
7 with which a site is accessible in individual cells. In agreement with this observation a large  
8 proportion of variability observed between cells was attributable to DHSs with low DNaseI  
9 accessibility in bulk samples (**Figure 2 – figure supplement 11**). In principle, variation between  
10 cells could be due to differential GpC MTase enzyme activity. However, the genome-wide levels of  
11 GpC methylation reached comparable levels in all cells and the variability between cells was not  
12 equally distributed across all DHS (**Fig. 2 d, Figure 2 –figure supplement 1**)

13 Measuring similarity of chromatin accessibility between cells was sufficient to group GM12878 and  
14 K562 cells based on their cell type of origin (**Fig. 3 a**). In this particular case, the separation is  
15 confounded with experimental batches. However, higher average GpC methylation in DHSs for the  
16 respective cell type compared to the DHSs of the other cell type indicated that scNOME-seq can  
17 differentiate the two cell types (**Supplemental Fig. 14**). Similarly, endogenous CpG methylation at  
18 different genomic features (DHS, 10 kb windows, gene bodies) was sufficient to distinguish  
19 between the two cell types. This approach should be extendable to scNOME-seq data from samples  
20 containing mixtures of cell types.

21 scNOME-seq measures chromatin accessibility at GpC di-nucleotides along the entire length of a  
22 sequencing read. Since most features that bind DNA are smaller than the length of 100 bp (200 bp  
23 within 200-50bp regions in the case of paired end reads), the regions covered by sequence-specific  
24 transcription factors and nucleosomes can be captured within a single fragment. This allows one to  
25 directly detect binding of TFs provided that their sequencing motif contains at least one GpC di-

1 nucleotide. I demonstrated the feasibility of this approach using CTCF binding sites. Of note, most  
2 motifs within regions of CTCF ChIP-seq peaks were protected from GpC methylation ('footprint')  
3 (**Fig. 5**). In agreement with an inferred binding event as the cause for this protection, scores for  
4 CTCF motifs that were associated with a footprint were significantly higher than for motifs without  
5 a footprint. Depending on the motif specificity of a given TF and provided that their motifs contain  
6 a GpC dinucleotide, similar measurements should be feasible for many TFs and could be used to  
7 infer the activity of a range of transcription factors in single cells or to measure combinatorial  
8 binding of two or more TFs.

9 Estimation of the average nucleosome phasing distances allows one to study chromatin compaction  
10 and complements the measurements of chromatin accessibility at regulatory regions and DNA  
11 methylation. The estimates from individual cells fit very well with measurements made from  
12 MNase-seq data in bulk samples(Valouev et al. 2011). It remains to be established whether the  
13 variation in phasing distances between individual cells is of biological or technical nature (**Fig. 6 e**).

14 These proof-of-principle experiments have been performed using commercial kits for bisulfite  
15 conversion and library amplification, additional optimization or alternative amplification  
16 approaches (Smallwood et al. 2014)are likely to increase the yield substantially. Compared to other  
17 single cell methods, for example ATAC-seq, scNOME-seq does not enrich for accessible chromatin  
18 regions and thus requires significantly more sequencing coverage. Ultimately, it should be possible  
19 to integrate the GpC MTase treatment into microfluidic workflows and combine this method with  
20 scRNA-seq, similar to recently published methods that combine scRNA-seq and methylome-  
21 sequencing (Angermueller et al. 2016). This study was primarily designed to test the feasibility of  
22 NOME-seq in single cells and only a small number of nuclei where sequenced for each cell line. As  
23 a consequence, this set up could not be used to study cell-to-cell variation in detail. scNOME-seq  
24 will be particularly useful for studies that aim to simultaneously measure chromatin accessibility  
25 and DNA methylation. This approach will be especially powerful for the characterization of

1 chromatin organization in single cells from heterogeneous mixtures or complex tissues, for example  
2 to samples of brain tissues or primary cancer cells.

3

## 4 **Methods**

### 5 **Cell culture, nuclei isolation, and GpC methylase treatment**

6 GM12878 (RRID:CVCL\_7526) and K562 (RRID:CVCL\_0004) cells were obtained directly from  
7 Coriell and ATCC, respectively. No further confirmation of the authenticity of these cell lines or  
8 mycoplasma testing has been performed. GM12878 were grown in RPMI medium 1640 (Gibco),  
9 supplemented with 2mM L-Glutamine (Gibco), and Penicilin and Streptavidin (Pen Strep, Gibco),  
10 and 15% fetal bovine serum (FBS, Gibco). K562 were grown in RPMI medium 1640 of the same  
11 composition but with 10% FBS. Cells were grown at 37 C and in 5% CO<sub>2</sub>. NOME-Seq procedure  
12 was performed based on protocols for CpG methyltransferase M.SSsI described in (Miranda et al.  
13 2010) and the GpC methyltransferase from *M.CviPI* (Kelly et al. 2012), with some modification.  
14 Between 2x10<sup>6</sup> and 5x10<sup>6</sup> cells were harvested by centrifuging the cell suspension for 5 min at  
15 500x g. Cells were washed once with 1x PBS, re-suspended in 1 ml lysis buffer (10mM Tris-HCl  
16 pH 7.4, 10mM NaCl, 3mM MgCl<sub>2</sub>) and incubated for 10 min on ice. IGEPAL CA-630 (Sigma) was  
17 added to a final concentration of 0.025% and the cell suspension was transferred to a 2 ml Dounce  
18 homogenizer. Nuclei were released by 15 strokes with the pestle. Success of lysis was confirmed by  
19 inspection under a light microscope. Nuclei were collected by centrifuging the cell suspension for 5  
20 min at 800x g at 4 C and washed twice with cold lysis buffer without detergent. One million nuclei  
21 were resuspended in reaction buffer to yield a suspension with a final concentration of 1x GpC  
22 MTase buffer (NEB), 0.32 mM S-Adenosylmethionine (SAM) (NEB), and 50 ul of GpC  
23 methyltransferase (4U/ul) from *M.CviPI* (NEB). The final reaction volume was 150 ul. The  
24 suspension was carefully mixed before incubating for 8 min at 37 C after which another 25 ul of  
25 enzyme and 0.7 ul of 32 mM SAM were added for an additional 8 min incubation at 37C. To avoid

1 disruption of nuclei incubation was stopped by adding 750 ul of 1x PBS and collecting the nuclei at  
2 800 xg. Supernatant was removed and nuclei were re-suspended in 500ul 1x PBS containing  
3 Hoechst 33342 DNA dye (NucBlue Live reagent, Hoechst). Nuclei were kept on ice until sorting.  
4 For preparation of bulk libraries in GM21878 cell, nuclei preparation and GpC MTase treatment  
5 was performed as described above. Nuclei were lysed immediately after incubation and DNA was  
6 isolated using Phenol/Chloroform purification.

### 7 **Nuclei isolation using Fluorescence activated cell sorting (FACS), lysis, and DNA bisulfite** 8 **conversion**

9 Nuclei were sorted at the Flow Cytometry core at the University of Chicago on a BD FACSAria or  
10 BD FACSAria Fusio equipped with a 96-well-plate holder. To obtain individual and intact nuclei  
11 gates were set on forward and side scatter to exclude aggregates and debris. DAPI/PacBlue channel  
12 or Violet 450/500 channel were used to excite the Hoechst 33342 DNA dye and to gate on cells  
13 with DNA content corresponding to cells in G1 phase of the cell cycle in order to maintain similar  
14 DNA content per cell and to remove potential heterogeneity attributable to cell cycle. Cells were  
15 sorted into individual wells pre-filled with 19 ul of 1x M-Digestion buffer (EZ DNA Methylation  
16 Direct Kit, Zymo Research) containing 1 mg/ml Proteinase K. Following collection, the plates were  
17 briefly spun to collect droplets that might form during handling. Nuclei were lysed by incubating  
18 the samples at 50 C for 20 min in a PCR cycler. DNA was subjected to bisulfite conversion by  
19 adding 130 ul of freshly prepared CT Conversion reagent (EZ DNA Methylation Direct Kit, Zymo)  
20 to the lysed nuclei. Conversion was performed by denaturing the DNA at 98 C for 8 min followed  
21 by 3.5 hrs incubation at 65 C. DNA isolation was performed using the EZ DNA Methylation Direct  
22 Kit (Zymo Research) following the manufacturer's instruction with the modification that the DNA  
23 was eluted in only 8 ul of elution buffer.

### 24 **Library preparation and sequencing**

1 Libraries were prepared using the Pico Methyl-seq Library prep Kit (Zymo Research) following the  
2 manufacturer's instruction for low input samples. Specifically, the random primers were diluted 1:2  
3 before the initial pre-amplification step and the first amplification was extended to a total of 10  
4 amplification cycles. Libraries were amplified with barcoded primers allowing for multiplexing.  
5 The sequences can be found in **Supplementary file 1**, primers were ordered from IDT. The  
6 purification of amplified libraries was performed using Agencourt AMPureXP beads (Beckmann  
7 Coulter), using a 1:1 ratio of beads and libraries. Concentration and size distribution of the final  
8 libraries was assessed on an Bioanalyzer (Agilent). Libraries with average fragment size above 150  
9 bp were pooled and sequenced. Libraries were sequenced on Illumina HiSeq 2500 in rapid mode  
10 (K562 cells) and HiSeq4000 (GM12878 cells).

### 11 **Read processing and alignment**

12 Sequences were obtained using 100 bp paired-end mode. For processing and alignment each read  
13 from a read pair was treated independently as this slightly improved the mapping efficiency. Before  
14 alignment, read sequences in fastq format were assessed for quality using fastqc  
15 (<http://www.bioinformatics.babraham.ac.uk/projects/fastqc/>). Reads were trimmed to remove low  
16 quality bases and 6 bp were clipped from the 5 prime end of each read to avoid mismatches  
17 introduced by amplification. In the case of GM12878 cells 6 bp were clipped from either end of the  
18 read. Only reads that remained longer than 20 bp were kept for further analyses. These processing  
19 steps were performed using trim\_galore version 0.4.0  
20 ([http://www.bioinformatics.babraham.ac.uk/projects/trim\\_galore/](http://www.bioinformatics.babraham.ac.uk/projects/trim_galore/)) with the following settings:  
21 *trim\_galore --quality 30 --phred33 --illumina --stringency 1 -e 0.1 --clip\_R1 6 --gzip --length 20 --*  
22 *output\_dir outdir Sample.fastq.gz*. The trimmed fastq files were aligned using the bisulfite aligner  
23 bismarck version 0.15.0 (Krueger et al. 2012) which calls bowtie2 (Langmead and Salzberg 2012)  
24 internally. Reads were aligned to the human genome (genome assembly hg38). Reads were aligned  
25 in single read mode using default settings. The amplification protocol used to generate the  
26 scNOME-seq libraries yielded non-directional libraries and alignment was performed with the  
27 option *--non\_directional (bismark --fastq --prefix SamplePrefix --output\_dir output\_dir --*

1 *non\_directional --phred33-quals --score\_min L,0,-0.2 --bowtie2 genome\_file trimmed.fastq.gz*.  
2 Some libraries contained small amounts of DNA from *C. elegans* as spike-ins, however these were  
3 not used during the analysis. Duplicates were removed using samtools version 0.1.19 (Li et al.  
4 2009) on sorted output files from bismark (*samtools rmdup SamplePrefix.sorted.bam*  
5 *SampleAligned\_rmdup.bam*).

## 6 **Extraction of GpC and CpG methylation status**

7 Coverage and methylation status of all cytosines was extracted using  
8 *bismark\_methylation\_extractor* (Krueger et al. 2012) (*bismark\_methylation\_extractor -s --ignore 6*  
9 *--output outdir --cytosine\_report --CX --genome\_folder path\_to\_genome\_data*  
10 *SampleAligned\_rmdup.bam*). The resulting coverage files were used to extract the methylation  
11 status of cytosines specifically in GpC and CpG di-nucleotides using the *coverage2cytosine* script  
12 which is part of Bismark (Krueger et al. 2012). The resulting coverage files contained cytosines in  
13 GCG context which are ambiguous given that they represent a cytosine both in GpC and CpG di-  
14 nucleotides. Coordinates of these ambiguous positions were identified using *oligoMatch* (Kent et al.  
15 2002) and these positions were removed from the coverage files. The number of unconverted  
16 cytosines (estimated based on apparent methylation rates in non-GpC and non-CpG context) was  
17 low in all libraries (<1%). However, it was noted that unconverted cytosines were not randomly  
18 distributed but associated with entirely unconverted reads. Regions covered by a read with more  
19 than 3 unconverted cytosines in non-CpG and non-GpC context were removed from further analysis  
20 as well. The genotype was not taken into account as its effect on calling the methylation status  
21 incorrectly was deemed negligible for the analyses performed here.

## 22 **Analysis of GpC and CpG methylation at genomic features in single cells**

23 ScNOME-seq data were compared to a number of genomic features in GM12878 and K562 cells  
24 collected by Encode (ENCODE Project ConsortiumThe ENCODE Project Consortium 2012) which  
25 were downloaded through the UCSC data repository (Karolchik et al. 2014). These datasets are



1 listed in **Supplementary file 1**. While the scNOME-seq data were aligned against human genome  
2 assembly hg38, some of the datasets were only available on genome assembly hg19 and the  
3 coordinates of these datasets were lifted from hg19 to hg38 using liftOver (Kent et al. 2002)  
4 (default re-mapping ratio 1). Nucleosome positions based on MNase-seq data in GM12878 were  
5 determined with DANPOS version 2.2.2 (Chen et al. 2013) using default settings. Resulting  
6 intervals were lifted to hg38. After removing summit locations with occupancy values above 300,  
7 the top 5% (713361) of nucleosome positions based on their summit occupancy value were used.

8 GpC and CpG methylation density across intervals encompassing DNase hypersensitivity sites  
9 (DHSs), transcription factor binding sites (TFBS), and well positioned nucleosomes was calculated  
10 across the 2 kb regions centered on the middle of these regions using the scoreMatrixBin function in  
11 the genomation package (Akalin et al. 2015) in R (R Core Team 2015). Data were aggregated in 5  
12 bp bins for each region and across all regions covered in a single cell. The average methylation  
13 level in pre-defined intervals (DHSs, TFBS) was determined by computing the average GpC or  
14 CpG methylation for each interval together with the number of GpC/CpGs covered in this interval  
15 using the map function in bedtools (Quinlan and Hall 2010). If no other cut-offs were given, DHSs  
16 were considered ‘covered’ and used in analyses when at least 4 GpCs occurring within the  
17 predefined interval were covered by sequencing data in an individual cell. Because the frequency of  
18 CpG di-nucleotides is significantly lower, only 2 CpGs were required in order for a DHSs to be  
19 considered covered for analyses that focused on endogenous DNA methylation. To count the  
20 number of cytosines within the primary sequence of a given DHSs only cytosines on the forward  
21 strand were counted. While each GpC dinucleotide can be measured on both strands and would  
22 therefore yield a count of two cytosines the data are sparse and each location will get at most a  
23 single read. This approach should therefore give a more conservative estimate of the possible GpC  
24 coverage. For analyses that used the scores of the peak regions, the peak scores reported the datasets  
25 from bulk samples were used (ENCODE Project ConsortiumThe ENCODE Project Consortium  
26 2012).

1 For analyses that were centered on transcription factor binding motifs the PWMs were obtained  
2 from the JASPAR database (2014) (Tan) for the TFs CTCF (MA0139), EBF1 (MA0154), and  
3 PU.1(MA0080). Genome-wide scanning for locations of sequence matches to the PWMs was  
4 performed using matchPWM in the Biotstring package (Pages et al. 2016) in R with a threshold of  
5 75% based on the human genome assembly hg38.

6 All plots were prepared using ggplot2 (Wickham 2009), with the exception of heatmaps displaying  
7 the average methylation density around genomic features in individual cells which were prepared  
8 using heatmap.2 in gplots (Warnes et al. 2016).

### 9 **Comparison of chromatin accessibility between cells**

10 Similarity in accessible chromatin between cells was calculated based on Jaccard similarity. Jaccard  
11 similarity index (eq. 1) was calculated between pairs of samples by first obtaining the intersection  
12 of DHSs covered in both samples of a pair with more than 4 GpCs. Each feature was annotated as  
13 open or closed, depending on the methylation status ( $\geq 40\%$  methylation) and only pairs in which  
14 at least one of the members was open were considered for this comparison.

$$15 \quad jacc(A, B) = \frac{(A \cap B)}{(A \cup B)} \quad (1)$$

16 The similarity between samples from GM12878 and K562 cells was calculated based on the union  
17 set of DHSs from both cell lines. The similarity indexes of all pairwise comparisons were used to  
18 compute the distances between each cell. The resulting clustered data were displayed as a heat map.

### 19 **CTCF footprints in single cells**

20 CTCF footprints were measured by comparing the GpC methylation level in each motif to the  
21 methylation level in the 50bp flanking regions immediately upstream and downstream of the motif.  
22 Overlapping motifs were merged into a single interval before determining the coordinates for  
23 flanking regions. To ensure sufficient GpC coverage for each interval the resulting three adjacent  
24 intervals for each locus were required to contain at least one covered GpC each, and 4 covered  
25 GpCs in total. This analysis only included regions that were accessible based on the methylation

1 status of the flanking regions (at least 50%). A CTCF footprint 'score' was determined by simply  
2 subtracting the average GpC methylation of the flanking regions from the GpC methylation of the  
3 motif.

4 scNOME-seq data were displayed in the UCSC genome browser (Kent et al. 2002) by converting  
5 the GpC methylation coverage file into a bed file and using the methylation value as score. To  
6 facilitated the visualization of the data in the context of previous Encode data the methylation files  
7 were lifted to hg19. The tracks shown together with scNOME-seq data are Open Chromatin by  
8 DNaseI HS from ENCODE/OpenChrom (Duke University) for DNaseI hypersensitivity,  
9 Nucleosome Signal from ENCODE/Stanford/BYU, and CTCF ChIP-seq signal from Broad Histone  
10 Modification by ChIP-seq from ENCODE/Broad Institute. All data are from GM12878 cells.

### 11 **Estimation of nucleosome phasing**

12 Nucleosome phasing estimates were obtained by first calculating the correlation coefficients for the  
13 methylation status of pairs of GpCs at different offset distances. These values were computed using  
14 a custom python script. Essentially, pairs of sequenced cytosines in GpC di-nucleotides were  
15 collected for each offset distance from 3bp to 400bp cytosine. At each offset distance the correlation  
16 of the methylation status was calculated across all pairs. Correlation coefficients were plotted  
17 against the offset distances revealing periodic changes in the correlation coefficient. The  
18 smoothed data were used to estimate the phasing distances by obtaining the offset distance  
19 corresponding to the local maximum found between 100 bp and 300 bp. To determine phase lengths  
20 of nucleosomes in different chromatin contexts the GpC coverage files were filtered for positions  
21 falling into categories defined by chromHMM (ENCODE Project ConsortiumThe ENCODE  
22 Project Consortium 2012; Ernst et al. 2011) before obtaining the correlation coefficients.

### 23 **Data access**

1 Raw data and methylation coverage files are available at GEO (<https://www.ncbi.nlm.nih.gov/geo/>)  
2 under the accession number GSE83882. Reviewers might use this link:  
3 <http://www.ncbi.nlm.nih.gov/geo/query/acc.cgi?token=glotewqqjbjqlvef&acc=GSE83882>

4

## 5 **Competing financial interest**

6 The author declares no competing financial interests

## 7 **Acknowledgements**

8 I like to thank Yoav Gilad for support, and Greg Crawford and colleagues in the Department of  
9 Human Genetics for helpful suggestions and comments on the manuscript. Cell sorting was  
10 performed by M. Olson and D. Leclerc at the Flow Cytometry core of the University of Chicago. I  
11 am grateful to Jason Lieb for his input and support at the beginning of this project. Preliminary  
12 experiments for this study were supported by a seed grant from the Big Ideas Generator (BIG) at the  
13 University of Chicago.

14

## 15 **References**

16

17 Akalin A, Franke V, Vlahoviček K, Mason CE, Schübeler D. 2015. Genomation: a toolkit to  
18 summarize, annotate and visualize genomic intervals. *Bioinformatics* **31**: 1127–1129.

19 Angermueller C, Clark SJ, Lee HJ, Macaulay IC, Teng MJ, Hu TX, Krueger F, Smallwood SEBA,  
20 Ponting CP, Voet T, et al. 2016. Parallel single-cell sequencing links transcriptional and  
21 epigenetic heterogeneity. *Nat Meth* 1–6.

22 Buenrostro JD, Wu B, Chang HY, Greenleaf WJ. 2015a. ATAC-seq: A Method for Assaying  
23 Chromatin Accessibility Genome-Wide. *Current protocols in molecular biology / edited by*  
24 *Frederick M Ausubel [et al]* **109**: 21.29.1–9.

25 Buenrostro JD, Wu B, Litzenburger UM, Ruff D, Gonzales ML, Snyder MP, Chang HY, Greenleaf  
26 WJ. 2015b. Single-cell chromatin accessibility reveals principles of regulatory variation. *Nature*  
27 1–15.

- 1 Chen K, Xi Y, Pan X, Li Z, Kaestner K, Tyler J, Dent S, He X, Li W. 2013. DANPOS: dynamic  
2 analysis of nucleosome position and occupancy by sequencing. *Genome Research* **23**: 341–351.
- 3 Cusanovich DA, Daza R, Adey A, Pliner HA, Christiansen L, Gunderson KL, Steemers FJ,  
4 Trapnell C, Shendure J. 2015. Multiplex single cell profiling of chromatin accessibility by  
5 combinatorial cellular indexing. *Science* **348**: 910–914.
- 6 ENCODE Project Consortium, The ENCODE Project Consortium. 2012. An integrated  
7 encyclopedia of DNA elements in the human genome. *Nature* **489**: 57–74.
- 8 Ernst J, Kheradpour P, Mikkelsen TS, Shores N, Ward LD, Epstein CB, Zhang X, Wang L, Issner  
9 R, Coyne M, et al. 2011. Mapping and analysis of chromatin state dynamics in nine human cell  
10 types. *Nature* **473**: 43–49.
- 11 Farlik M, Sheffield NC, Nuzzo A, Datlinger P, Schönegger A, Klughammer J, Bock C. 2015.  
12 Single-Cell DNA Methylome Sequencing and Bioinformatic Inference of Epigenomic Cell-  
13 State Dynamics. *CellReports* **10**: 1386–1397.
- 14 Jaitin DA, Kenigsberg E, Keren-Shaul H, Elefant N, Paul F, Zaretsky I, Mildner A, Cohen N, Jung  
15 S, Tanay A, et al. 2014. Massively parallel single-cell RNA-seq for marker-free decomposition  
16 of tissues into cell types. *Science* **343**: 776–779.
- 17 Jin W, Tang Q, Wan M, Cui K, Zhang Y, Ren G, Ni B, Sklar J, Przytycka TM, Childs R, et al.  
18 2015. Genome-wide detection of DNase I hypersensitive sites in single cells and FFPE tissue  
19 samples. *Nature* 1–17.
- 20 Karolchik D, Barber GP, Casper J, Clawson H, Cline MS, Diekhans M, Dreszer TR, Fujita PA,  
21 Guruvadoo L, Haussler M, et al. 2014. The UCSC Genome Browser database: 2014 update.  
22 *Nucleic Acids Research* **42**: D764–70.
- 23 Kelly TK, Liu Y, Lay FD, Liang G, Berman BP, Jones PA. 2012. Genome-wide mapping of  
24 nucleosome positioning and DNA methylation within individual DNA molecules. *Genome*  
25 *Research* **22**: 2497–2506.
- 26 Kent WJ, Sugnet CW, Furey TS, Roskin KM, Pringle TH, Zahler AM, Haussler D. 2002. The  
27 human genome browser at UCSC. *Genome Research* **12**: 996–1006.
- 28 Kilgore JA, Hoose SA, Gustafson TL, Porter W, Kladde MP. 2007. Single-molecule and population  
29 probing of chromatin structure using DNA methyltransferases. *Methods* **41**: 320–332.
- 30 Krueger F, Kreck B, Franke A, Andrews SR. 2012. DNA methylome analysis using short bisulfite  
31 sequencing data. *Nat Meth* **9**: 145–151.
- 32 Langmead B, Salzberg SL. 2012. Fast gapped-read alignment with Bowtie 2. *Nat Meth* **9**: 357–359.
- 33 Li H, Handsaker B, Wysoker A, Fennell T, Ruan J, Homer N, Marth G, Abecasis G, Durbin R,  
34 1000 Genome Project Data Processing Subgroup. 2009. The Sequence Alignment/Map format  
35 and SAMtools. *Bioinformatics* **25**: 2078–2079.
- 36 Macosko EZ, Basu A, Satija R, Nemesh J, Shekhar K, Goldman M, Tirosh I, Bialas AR, Kamitaki  
37 N, Martersteck EM, et al. 2015. Highly Parallel Genome-wide Expression Profiling of  
38 Individual Cells Using Nanoliter Droplets. *Cell* **161**: 1202–1214.
- 39 Maurano MT, Stamatoyannopoulos JA. 2015. Taking Stock of Regulatory Variation. *Cell Systems*

- 1           1: 18–21.
- 2   Miranda TB, Kelly TK, Bouazoune K, Jones PA. 2010. Methylation-sensitive single-molecule  
3       analysis of chromatin structure. *Current protocols in molecular biology / edited by Frederick M*  
4       *Ausubel [et al]* **Chapter 21**: Unit 21.17.1–16.
- 5   Neph S, Vierstra J, Stergachis AB, Reynolds AP, Haugen E, Vernot B, Thurman RE, John S,  
6       Sandstrom R, Johnson AK, et al. 2012. An expansive human regulatory lexicon encoded in  
7       transcription factor footprints. *Nature* **489**: 83–90.
- 8   Pages H, Aboyoun P, Gentleman RC, DebRoy S. 2016. *Biostrings: String objects representing*  
9       *biological sequences, and matching algorithms*.
- 10   Quinlan AR, Hall IM. 2010. BEDTools: a flexible suite of utilities for comparing genomic features.  
11       *Bioinformatics* **26**: 841–842.
- 12   R Core Team. 2015. *R: A language and environment for statistical computing*. [https://www.R-](https://www.R-project.org/)  
13       [project.org/](https://www.R-project.org/).
- 14   Rotem A, Ram O, Shores N, Sperling RA, Goren A, Weitz DA, Bernstein BE. 2015. Single-cell  
15       ChIP-seq reveals cell subpopulations defined by chromatin state. *Nature Biotechnology* **33**: 1–  
16       11.
- 17   Schones DE, Cui K, Cuddapah S, Roh T-Y, Barski A, Wang Z, Wei G, Zhao K. 2008. Dynamic  
18       Regulation of Nucleosome Positioning in the Human Genome. *Cell* **132**: 887–898.
- 19   Schübeler D. 2015. Function and information content of DNA methylation. *Nature* **517**: 321–326.
- 20   Shalek AK, Satija R, Shuga J, Trombetta JJ, Gennert D, Lu D, Chen P, Gertner RS, Gaublotte JT,  
21       Yosef N, et al. 2014. Single-cell RNA-seq reveals dynamic paracrine control of cellular  
22       variation. *Nature* **510**: 263–269.
- 23   Small EC, Xi L, Wang J-P, Widom J, Licht JD. 2014. Single-cell nucleosome mapping reveals the  
24       molecular basis of gene expression heterogeneity. *Proc Natl Acad Sci USA* **111**: E2462–71.
- 25   Smallwood SA, Lee HJ, Angermueller C, Krueger F, Saadeh H, Peat J, Andrews SR, Stegle O,  
26       Reik W, Kelsey G. 2014. Single-cell genome-wide bisulfite sequencing for assessing epigenetic  
27       heterogeneity. *Nat Meth* **11**: 817–820.
- 28   Stadler MB, Murr R, Burger L, Ivanek R, Lienert F, Schöler A, van Nimwegen E, Wirbelauer C,  
29       Oakeley EJ, Gaidatzis D, et al. 2011. DNA-binding factors shape the mouse methylome at  
30       distal regulatory regions. *Nature* 1–7.
- 31   Taberlay PC, Statham AL, Kelly TK, Clark SJ, Jones PA. 2014. Reconfiguration of nucleosome-  
32       depleted regions at distal regulatory elements accompanies DNA methylation of enhancers and  
33       insulators in cancer. *Genome Research* **24**: 1421–1432.
- 34   Tan G. JASPAR2014: Data package for JASPAR. <http://jaspar.genereg.net/>.
- 35   Treutlein B, Brownfield DG, Wu AR, Neff NF, Mantalas GL, Espinoza FH, Desai TJ, Krasnow  
36       MA, Quake SR. 2014. Reconstructing lineage hierarchies of the distal lung epithelium using  
37       single-cell RNA-seq. *Nature* **509**: 371–375.
- 38   Valouev A, Johnson SM, Boyd SD, Smith CL, Fire AZ, Sidow A. 2011. Determinants of

- 1 nucleosome organization in primary human cells. *Nature* **474**: 516–520.
- 2 Warnes GR, Bolker B, Bonebakker L, Gentleman R. 2016. *gplots: Various R programming tools*  
3 *for plotting data*. R package version <https://CRAN.R-project.org/package=gplots>.
- 4 Wickham H. 2009. *ggplot2*. Springer Science & Business Media, New York, NY.
- 5 Ziller MJ, Edri R, Yaffe Y, Donaghey J, Pop R, Mallard W, Issner R, Gifford CA, Goren A, Xing J,  
6 et al. 2014. Dissecting neural differentiation regulatory networks through epigenetic  
7 footprinting. *Nature* 1–16.

8

9

10

11

## 12 **Figure Legends**

13 **Figure 1 scNOMe-seq detected DNase hypersensitive sites in single cells.** a) Schematic of GpC  
14 methyltransferase-based mapping of chromatin accessibility and simultaneous detection of  
15 endogenous DNA methylation. b) Schematic of scNOMe-seq procedure introduced in this study.

16 **Figure 1 – figure supplement 1: FACS profile from Hoechst stained nuclei to assess DNA**  
17 **content.** Nuclei were stained with Hoechst 33342 DNA dye and nuclei with DNA content  
18 corresponding to the G1-phase of the cell cycle were sorted into individual wells in a 96 well plate.  
19 Aggregates and debris were removed using gates on forward and side scatter.

20

21 **Figure 1 – figure supplement 2: Schematic of experimental set up.** A total of 19 individual cells  
22 from GM12878 were profiled in this study, 12 of these cells were exposed to GpC MTase and 7  
23 were subjected to the same process without exposure to MTase. For K562 11 cells were profiled all  
24 of which were subjected to GpC MTase treatment.

25

26 **Figure 1 – figure supplement 3: Number of covered GpC and CpG dinucleotides is**  
27 **proportional to the number of total bases covered.** Number of covered cytosines in GpC and  
28 CpG dinucleotides plotted against the total number of nucleotides covered per sample. This  
29 comparison suggests that there is no strong bias towards or against GpC and CpG dinucleotides.  
30 This plot also shows that the coverage was about 2-fold higher for K562 cells compared to  
31 GM12878.

32

33

34 **Figure 2 scNOMe-seq data reveal how accessibility in single cells underlies observed DNaseI**  
35 **hypersensitivity in a population of cells.** a) Average GpC methylation level (blue) and CpG

1 methylation level (orange) at DHSs in GM12878 cells. Regions are centered on the middle of  
2 DNase-seq peak locations. Shown is the average methylation across a 2 kb window of 12 GM12878  
3 cells. b) Heatmap displaying the average GpC methylation level across the same regions as in a).  
4 Each row corresponds to an individual GM12878 cell. Cells were grouped by similarity. c)  
5 Proportion of DHSs covered by scNOME-seq sequencing reads in each cell. The proportion  
6 displayed corresponds to the fraction of DHSs covered by at least 1 or 4 GpCs in a given cell. Only  
7 DHSs with at least 1 GpC (red) or 4 GpCs (cyan) within their primary sequence were taken in  
8 consideration. Error bars represent standard deviation. d) Average GpC methylation at DHSs  
9 grouped into quartiles based on associated DNase-seq peak scores from lowest to highest scores.  
10 ‘Shuffled’ represents methylation data in genomic regions obtained by random placements of DHS  
11 peak intervals. Data shown are from GM12878 cells. e) Fraction of accessible sites in individual  
12 GM12878 cells (red) and K562 cells (cyan). Shown are the means and standard deviation based on  
13 all cells. f) Scatter plot showing relationship between GpC methylation levels and DHS peaks score  
14 for each covered DHS. Plot shows data from all individual GM12878 cells. Red trend line is shown  
15 to visualize the relationship between GpC methylation and endogenous CpG methylation. g) Scatter  
16 plot showing relationship between CpG methylation levels and DHS peaks score for each covered  
17 DHS. Plot shows data from all individual GM12878 cells. Red trend line is shown to visualize the  
18 relationship between CpG methylation and peak scores. h) Plot illustrates the relationship between  
19 endogenous CpG methylation and GpC methylation at DHS loci. Plot shows combined data from  
20 all GM12878 cells. Correlation was calculated based on Pearson correlation ( $r = -0.13$ ) i) Average  
21 CpG methylation at DHS loci grouped based on GpC scores within single cells. Each dot represents  
22 the average CpG methylation level for a single cell.

23

24 **Figure 2 – figure supplement 1: Average CpG and GpC methylation levels in single cells.**

25 Boxplots representing the methylation level at CpG and GpC dinucleotides for groups of cells  
26 (GM12878 w/ and w/o MTase, K562 w/ MTase). GM12878 and K562 cells show different levels of  
27 CpG methylation. The difference in CpG methylation between GM12878 w/o MTase and  
28 GM12878 w/ MTase treatment was largely driven by two cells. These cells were kept as no other  
29 criterion suggested their removal. GpC MTase treated cells shows a clear enrichment of GpC  
30 methylation while GM12878 cells not exposed to MTase do not show levels above 1%. These  
31 might reflect incomplete conversion, minimal cross-contamination during the parallel preparation,  
32 or activity of endogenous methyltransferases.

33

34 **Figure 2 – figure supplement 2: Heatmaps of average GpC and CpG methylation across DHS**  
35 **regions in GM12878 cells.** Each row represents data from an individual cell, both treated and



1 control samples are plotted together. Cells were grouped using hierarchical clustering based on GpC  
2 methylation (left) and CpG methylation (right) within 2 kb regions around DHSs. As expected GpC  
3 methylation clearly separates MTase treated and untreated samples. Endogenous CpG methylation  
4 does not differ systematically between MTase treated and untreated samples.

5  
6 **Figure 2 – figure supplement 3: Average GpC and CpG methylation across DHS regions in**  
7 **K562 cells.**

8 Average GpC methylation level (blue) and CpG methylation level (orange) at DNase  
9 Hypersensitive sites (DHSs) in K562 cells. Regions are centered on the middle of DNase-seq peak  
10 locations. Shown is the average methylation across a 2 kb window of the pool of 11 K562 cells.

11 **Figure 2 – figure supplement 4: Heatmaps of average GpC and CpG methylation across DHS**  
12 **regions in K562 cells.** Each row represents data from an individual cell. Cells were grouped using  
13 hierarchical clustering based on GpC methylation (left) and CpG methylation (right) within 2kb  
14 regions around DHSs.

15  
16 **Figure 2 – figure supplement 5: Distribution of counts of GpCs within DHSs in GM12878 and**  
17 **K562 cells.** Histogram shows the number of GpCs per DHS in GM12878 cells (left) and K562 cells  
18 (right). While each GpC dinucleotide can be measured on both strands and would therefore yield a  
19 count of two cytosines this histogram only displays counts per GpC (using the cytosines on the  
20 forward strand). This is to account for the fact that in single cells DHSs will be covered at most by  
21 one or two reads that originate from the same fragment.

22  
23 **Figure 2 – figure supplement 6: Proportion of DHSs at different cutoffs for GpCs and CpGs.**  
24 Bar graphs display proportion of DHSs that contain at least the number of GpCs (left) and CpGs  
25 (right) indicated. The proportions are given in relation to the total number of DHSs in each cell line.  
26 Numbers in the bars refer to the number of DHSs at that GpC and CpG threshold. As described in  
27 **Figure 2 – figure supplement 5** and methods, only cytosines in GpC and CpG di-nucleotides on  
28 the forward strand were counted for this analysis.

29  
30 **Figure 2 – figure supplement 7: Relationship between DNase-seq peak score and GpC and**  
31 **CpG methylation in GM12878 and K562 cells** a) Average GpC methylation and b), c)  
32 endogenous CpG methylation at DHSs grouped into quartiles based on associated DNase-seq peak  
33 scores from lowest to highest scores. ‘Shuffled’ represents methylation data in genomic regions

1 obtained by random placements of DHS peak intervals. a) and c) show data for 11 K562 cells and  
2 b) shows data for 12 GM12878 cells. Each point represents average score from a single cell.

3 **Figure 2 – figure supplement 8: Correlation between GpC methylation and DHS peak score**  
4 Shown are correlation coefficients for comparisons between single cell and bulk NOME-seq data  
5 with DNase-seq peak score for each covered location for a) GM12878 and b) K562. Each dot  
6 represents value for a single Pearson correlation. The correlation between GpC methylation and  
7 DHS peaks scores was significantly lower in single cells compared to bulk NOME-seq data. No  
8 correlation was observed between GpC methylation and DHS peak score using randomized DHS  
9 locations.

10 **Figure 2 – figure supplement 9: Cumulative distribution of average GpC methylation in DHSs**  
11 **in GM12878 and K562 cells.** Plot of cumulative distribution of GpC methylation for individual  
12 GM12878 and K562 cells at DHSs with at least 4 covered GpC. GM12878 and K562 cells exposed  
13 to GpC MTase show similar distributions. About 50% of all cells show no or low methylation ( $\leq$   
14 25%). GM12878 cells not exposed to GpC MTase do not show any significant number of DHSs  
15 with GpC methylation.

16  
17 **Figure 2 – figure supplement 10: Proportion of accessible DHSs remains stable across range**  
18 **of thresholds for methylation levels and covered GpCs per site.**

19 Different thresholds for GpC methylation and number of covered GpC required per individual DHS  
20 were used to test how much the number of resulting ‘accessible’ DHSs depended on these  
21 parameters. Threshold for GpC methylations was varied between 25% and 50% while the number  
22 of required GpCs for a DHSs to be considered in this analysis was varied between 1 and 8. The  
23 proportion of accessible sites is plotted for each set of parameters in GM12878 cells (left) and K562  
24 cells (right). Proportion of accessible sites remained relatively stable across the range of parameters.  
25 Note that the categories with low GpCs count thresholds contain all sites above this threshold.

26  
27 **Figure 2 – figure supplement 11: Cell-to-cell variability in DHSs accessibility reflects DNaseI**  
28 **hypersensitivity of the region.** Pair-wise jaccard distances between GM12878 (a) and K562 (b)  
29 cells, respectively, were calculated based on DHSs accessibility in individual cells. DHSs were  
30 grouped by DNase-seq peak scores and DHSs were considered accessible if the average  
31 methylation for that locus was above 40%. Only DHSs with at least 4 covered GpCs were included  
32 in this analysis.

33

1 **Figure 2 – figure supplement 12: Comparison of correlations between single cell NOME-seq**  
2 **and bulk NOME-seq data sets.** Shown are the correlation coefficients for comparisons between  
3 GpC methylation in single cell and bulk NOME-seq data within DNase-seq peak location for a)  
4 GM12878 and b) K562. Each dot represents value for a single Pearson correlation. Comparison was  
5 performed on original DHS loci (left) and on randomized DHS loci (right).

6  
7 **Figure 2 – figure supplement 13: GpC methylation correlates with DHS peaks scores in**  
8 **individual cells.** High DHS peak scores are associated with higher GpC methylation in single cells.  
9 Scatter plot showing relationship between GpC methylation levels and DHS peaks scores for each  
10 covered DHS. Each plot shows data from an individual GM12878 cell. Red trend line to aid  
11 visualization of the relationship between GpC methylation and peak scores.

12  
13 **Figure 2 – figure supplement 14: Endogenous CpG methylation is inversely correlated with**  
14 **DHS peak scores in individual cells.** High DHS peak scores are associated with lower endogenous  
15 CpG methylation in single cells. Scatter plot showing relationship between CpG methylation levels  
16 and DHS peaks score for each covered DHS. Each plot shows data from an individual GM12878  
17 cell. Red trend line to aid visualization of the relationship between GpC methylation and peak  
18 scores.

19  
20 **Figure 2 – figure supplement 15: Comparison of CpG and GpC methylation status at**  
21 **individual DHS in single GM12878 cells.** Smoothened scatterplot illustrates the relationship  
22 between endogenous CpG methylation and GpC methylation at DHS loci. Each plot shows data  
23 from a single GM12878 cell.

24  
25  
26 **Figure 3 Single cell NOME-seq reveals chromatin features closely linked to gene expression.**  
27 a) Average GpC methylation level at TSS in GM12878 cells. Regions are centered on the TSS  
28 locations. Shown is the average methylation across a 2 kb window of 12 GM12878 cells. b) Same  
29 as in a) but displaying the endogenous CpG methylation level. C) Average endogenous CpG  
30 methylation at gene loci in individual GM12878 cells. Shown is the average methylation across  
31 gene bodies (represented as meta genes) and 50 kb regions upstream and downstream of each gene.  
32 Each line represents the aggregated CpG methylation data for a single GM12878 cell (TES:  
33 transcription end site). d) Boxplot displays average CpG methylation in gene bodies. Genes were  
34 grouped into quartiles based on their transcript levels in bulk. Dots represent the average CpG

1 methylation value for individual cells. e) Boxplot displays average GpC methylation in promoter  
2 regions (-500 bp to +150 bp). Genes were grouped into quartiles based on their transcript levels in  
3 bulk. f) Similar to e) but displayed are the levels of endogenous CpG methylation.

4 **Figure 3 – figure supplement 1: Endogenous methylation in gene bodies of single K562 cells a)**

5 Average endogenous CpG methylation at gene loci in individual K562 cells. Shown is the average  
6 methylation across gene bodies (represented as meta genes) and 50 kb regions upstream and  
7 downstream of each gene. Each line represents the aggregated CpG methylation data for a single  
8 K562 cell (TES: transcription end site). b) Boxplot displays average CpG methylation in gene  
9 bodies. Genes were grouped into quartiles based on their transcript levels in bulk. Dots represent the  
10 average CpG methylation value for individual cells.

11 **Figure 3 – figure supplement 2: Chromatin accessibility in promoters correlates with**

12 **transcript levels of adjacent genes a)** Average GpC methylation level at TSS genes in GM12878  
13 cells. Regions are centered on the TSS locations and genes were grouped into quartiles based on  
14 their transcript levels in bulk GM12878 cells. b) The same plot as in a) based on scNOME-seq data  
15 from K562 cells and, correspondingly, transcript levels in K562 cells.

16

17 **Figure 4: single cell GpC and CpG methylation signal is sufficient to group GM12878 and**

18 **K562 cells according to their origin a)** Heatmap shows similarity scores (pair-wise Jaccard

19 distances) for accessibility between all GM12878 and K562 cells measured on the union set of

20 DHSs from GM12878 and K562 cells. Cells were grouped based on unsupervised hierarchical

21 clustering. b) Average GpC methylation at the DHSs from GM12878 cells and K562 cells,

22 respectively, was calculated for all individual GM12878 and K562 cells. The resulting two values

23 for GpC methylation are displayed for each cell. GM12878 and K562 are separable based on these

24 data. GM12878 and K562 cells showed different levels of genome-wide GpC methylation.

25 Consequently, the average methylation levels at K562 DHSs for both cell types are similar.

26 However, for cells from either cell type the methylation levels are higher in the DHSs of the cell

27 type of origin than in the DHSs of the other cell type. c) Heatmap shows correlation coefficients

28 between all GM12878 and K562 cells for pair-wise comparison of CpG methylation levels.

29 Genome was divided into 10 kb bins and only bins with sufficient coverage in both cells were used

30 for a given pair ( $\geq 20$  covered CpGs). Cells were grouped based on unsupervised hierarchical

31 clustering.

32 **Figure 4 – figure supplement 1 Single GM12878 and K562 cells can be grouped based on GpC**

33 **methylation and endogenous methylation a)** Heatmap shows correlation coefficients for GpC

1 methylation between all GM12878 and K562 cells measured on the union set of DHSs from  
2 GM12878 and K562 cells. Cells were grouped based on unsupervised hierarchical clustering. Only  
3 DHS with at least 4 covered GpCs in both cells were used for pair-wise comparison. b) Same as in  
4 a) but based on CpG methylation level in the union set of DHSs, at least 2 covered CpGs in both  
5 cells were required to include a DHS in the pair-wise comparison. c) Heatmap shows correlation  
6 coefficients between all GM12878 and K562 cells for pair-wise comparison of CpG methylation  
7 levels in gene bodies. Only loci with sufficient coverage in both cells were used for a given pair ( $\geq$   
8 10 covered CpGs). Cells were grouped based on unsupervised hierarchical clustering. All  
9 correlation coefficients were calculated using Pearson correlation.

10

11 **Figure 5. scNOME-seq detected characteristic accessibility patterns at CTCF transcription**  
12 **factor binding sites and measured CTCF footprints at individual loci** a) Average GpC  
13 methylation level (blue) and CpG methylation level (orange) at CTCF binding sites in GM12878  
14 cells. Regions are centered on motif locations. Shown is the average methylation across a 2 kb  
15 window of the pool of 12 GM12878 cells. b) Heatmap displaying the average GpC methylation  
16 across CTCF binding sites. Each row corresponds to an individual GM12878 cell and rows are  
17 grouped by similarity. c) Schematic outline the measurement of CTCF footprints in accessible  
18 regions. M denotes CTCF binding motifs within CTCF ChIP-seq regions and U and D indicate 50  
19 bp upstream and downstream flanking regions. footprint score was determined by subtracting the  
20 average GpC methylation in the flanking regions from the GpC methylation at the motif. d)  
21 Heatmap displays GpC methylation in accessible regions found in a representative GM12878 cell  
22 (GM\_1). Each row represents a single CTCF motif instance within a CTCF ChIP-seq region.  
23 Average methylation values for the motif and the 50 bp upstream and downstream regions are  
24 shown separately. Regions are sorted based on the footprint score. Displayed are only regions that  
25 had sufficient GpC coverage and that were considered accessible based on the methylation status of  
26 the flanking regions. e) Heatmap reporting the CTCF motif scores for the motif regions in d).  
27 Regions are sorted in the same order as in d). f) Average number of accessible regions at CTCF  
28 motifs and the average number of those with a detectable footprint per individual GM12878 cell.  
29 Error bars reflect standard deviation. g) Average CTCF motif scores in regions with and without  
30 CTCF footprint for all 12 GM12878 cells. Each line connects the two data points from an individual  
31 cell h) Combined display of scNOME-seq data from this study and DNase hypersensitivity data,  
32 nucleosome occupancy, and CTCF ChIP-seq data from ENCODE. Upper panel shows a ~10 kb  
33 region containing a CTCF binding site. DNaseI hypersensitivity data and nucleosome density show  
34 characteristic distribution around CTCF binding sites in GM12878 cells. Lower panel shows the

1 GpC methylation data of 5 individual cells that had sequencing coverage in this region, 4 of the  
2 cells provide GpC data covering the CTCF motif located in the region. scNOME-seq data tracks  
3 show methylation status of individual GpCs. Each row corresponds to data from a single cell. These  
4 data indicate that binding of CTCF is detected in all 4 cells. Data are displayed as tracks in the  
5 UCSC genome browser (<http://genome.ucsc.edu>).

6 **Figure 5 – figure supplement 1: Average GpC methylation and endogenous CpG methylation**  
7 **at CTCF sites in pooled K562 cells** Average GpC methylation level (blue) and CpG methylation  
8 level (orange) at CTCF binding sites in K562 cells. Regions are centered on motif locations. Shown  
9 is the average methylation across a 2 kb window of the pool of 11 K562 cells.

10

11 **Figure 5 – figure supplement 2: Average GpC methylation level at CTCF binding sites in**  
12 **individual K562 cells.** Heatmap shows the average GpC methylation across a 2 kb window  
13 centered on the CTCF motif location. Each row corresponds to an individual K562 cell and rows  
14 are grouped by hierarchical clustering.

15

16 **Figure 5 – figure supplement 3: Average GpC methylation and endogenous CpG methylation**  
17 **at additional transcription factor binding sites in pools of GM12878 and K562 cells.** Average  
18 GpC methylation level (blue) and CpG methylation level (orange) at a) PU.1 binding sites in  
19 GM12878 cells and b) EBF1 binding sites. Regions are centered on motif locations. Shown is the  
20 average methylation across a 2 kb window of the pool of 12 GM12878 cells. c) Same plot as in a)  
21 but based on PU.1 binding sites in K562 cells. Regions are centered on motif locations. Shown is  
22 the average methylation across a 2 kb window of the pool of 11 K562 cells.

23

24 **Figure 5 – figure supplement 4: Scores at CTCF motifs with footprints are significantly**  
25 **higher than those without.** Boxplot representing the CTCF motif scores in regions with and  
26 without CTCF footprint of an individual GM12878 cell (GM\_1, the same cell as shown in Figure 3  
27 d and e)).

28

29 **Figure 5 – figure supplement 5: Loci with CTCF footprint in single cells.** At each locus  
30 scNOME-seq data from this study and DNase hypersensitivity data from ENCODE are shown.  
31 scNOME-seq data tracks show methylation status of individual GpCs. Each row corresponds to data  
32 from a single cell, Colors indicate the methylation status of each GpC (yellow: methylated; blue:  
33 unmethylated). Data are displayed as tracks in the UCSC genome browser.

34

35

1 **Figure 6. Nucleosome phasing in single cells.** a) Average GpC methylation level and b) CpG  
2 methylation level at well-positioned nucleosomes in GM12878 cells. Regions are centered on  
3 midpoints of top 5% of positioned nucleosomes. Shown is the average methylation across a 2 kb  
4 window of the pool of 12 GM12878 cells. c), d) Correlation coefficients for the comparison in  
5 methylation status between GpCs separated by different offset distances for GM12878 (c) and K562  
6 (d) cells. Each line represents a single cell. Data are smoothened for better visualization. e)  
7 Distribution of estimated phase lengths for GM12878 and K562 cells. f) Nucleosome phasing in  
8 GM12878 in genomic regions associated with different chromatin states defined by chromHMM  
9 (ENCODE). Boxplot represents the distribution of estimated phase lengths from all 12 GM12878  
10 cells and overlaid points indicate values of each individual cells.

11 **Figure 6 – figure supplement 1: Number of nucleotide pairs used for correlation at each offset**  
12 **distance.** Plotted is the number of nucleotide pairs that are found at each offset distance and used to  
13 calculate the correlation coefficient at that distance. The number of comparison declines  
14 precipitously. While each read has a maximum of 100 bp all samples were sequenced in paired-end  
15 mode and even though the alignment was performed in single end mode additional comparisons can  
16 therefore be made in most cases based on GpCs covered in the read from the opposite side of a  
17 fragment. In many cases, the data become too sparse beyond 400 bp. Each line represents data from  
18 an individual cell. Data from GM12878 and K562 cells are plotted on the left and right,  
19 respectively.

20 **Figure 6 – figure supplement 2: Offset distances with a high proportion of GpC pairs that**  
21 **share methylation status indicate average phasing distance.** Shown is the proportion of  
22 nucleotide pairs at each offset distance in which both cytosines are methylated. These  
23 measurements yield curves very similar to the distribution of Pearson correlation coefficients  
24 (Figure 6 c and d).

25

26 **Supplementary file 1: Table 1:** scNOME-seq libraries used in this paper and their technical details  
27 and alignment summary statistics. **Table 2:** Primer sequences of primers used for amplification and  
28 barcoding of sequencing library. **Table 3:** Additional datasets used in this study and their sources.

29

30

## Figure Legends

**Figure 1: scNOME-seq detected DNase hypersensitive sites in single cells.** a) Schematic of GpC methyltransferase-based mapping of chromatin accessibility and simultaneous detection of endogenous DNA methylation. b) Schematic of scNOME-seq procedure introduced in this study.

**Figure 2: scNOME-seq data reveal how accessibility in single cells underlies observed DNaseI hypersensitivity in a population of cells.** a) Average GpC methylation level (blue) and CpG methylation level (orange) at DHSs in GM12878 cells. Regions are centered on the middle of DNase-seq peak locations. Shown is the average methylation across a 2 kb window of 12 GM12878 cells. b) Heatmap displaying the average GpC methylation level across the same regions as in a). Each row corresponds to an individual GM12878 cell. Cells were grouped by similarity. c) Proportion of DHSs covered by scNOME-seq sequencing reads in each cell. The proportion displayed corresponds to the fraction of DHSs covered by at least 1 or 4 GpCs in a given cell. Only DHSs with at least 1 GpC (red) or 4 GpCs (cyan) within their primary sequence were taken in consideration. Error bars represent standard deviation. d) Average GpC methylation at DHSs grouped into quartiles based on associated DNase-seq peak scores from lowest to highest scores. ‘Shuffled’ represents methylation data in genomic regions obtained by random placements of DHS peak intervals. Data shown are from GM12878 cells. e) Fraction of accessible sites in individual GM12878 cells (red) and K562 cells (cyan). Shown are the means and standard deviation based on all cells. f) Scatter plot showing relationship between GpC methylation levels and DHS peaks score for each covered DHS. Plot shows data from all individual GM12878 cells. Red trend line is shown to visualize the relationship between GpC methylation and endogenous CpG methylation. g) Scatter plot showing relationship between CpG methylation levels and DHS peaks score for each covered DHS. Plot shows data from all individual GM12878 cells. Red trend line is shown to visualize the relationship between CpG methylation and peak scores. h) Plot illustrates the relationship between endogenous CpG methylation and GpC methylation at DHS loci. Plot shows combined data from all GM12878 cells. Correlation was calculated based on Pearson correlation ( $r = -0.13$ ) i) Average CpG methylation at DHS loci grouped based on GpC scores within single cells. Each dot represents the average CpG methylation level for a single cell.



**Figure 3: Single cell NOME-seq reveals chromatin features closely linked to gene expression.**

a) Average GpC methylation level at TSS in GM12878 cells. Regions are centered on the TSS locations. Shown is the average methylation across a 2 kb window of 12 GM12878 cells. b) Same as in a) but displaying the endogenous CpG methylation level. c) Average endogenous CpG methylation at gene loci in individual GM12878 cells. Shown is the average methylation across gene bodies (represented as meta genes) and 50 kb regions upstream and downstream of each gene. Each line represents the aggregated CpG methylation data for a single GM12878 cell (TES: transcription end site). d) Boxplot displays average CpG methylation in gene bodies. Genes were grouped into quartiles based on their transcript levels in bulk. Dots represent the average CpG methylation value for individual cells. e) Boxplot displays average GpC methylation in promoter regions (-500 bp to +150 bp). Genes were grouped into quartiles based on their transcript levels in bulk. f) Similar to e) but displayed are the levels of endogenous CpG methylation.

**Figure 4: single cell GpC and CpG methylation signal is sufficient to group GM12878 and K562 cells according to their origin**

a) Heatmap shows similarity scores (pair-wise Jaccard distances) for accessibility between all GM12878 and K562 cells measured on the union set of DHSs from GM12878 and K562 cells. Cells were grouped based on unsupervised hierarchical clustering. b) Average GpC methylation at the DHSs from GM12878 cells and K562 cells, respectively, was calculated for all individual GM12878 and K562 cells. The resulting two values for GpC methylation are displayed for each cell. GM12878 and K562 are separable based on these data. GM12878 and K562 cells showed different levels of genome-wide GpC methylation. Consequently, the average methylation levels at K562 DHSs for both cell types are similar. However, for cells from either cell type the methylation levels are higher in the DHSs of the cell type of origin than in the DHSs of the other cell type. c) Heatmap shows correlation coefficients between all GM12878 and K562 cells for pair-wise comparison of CpG methylation levels. Genome was divided into 10 kb bins and only bins with sufficient coverage in both cells were used for a given pair ( $\geq 20$  covered CpGs). Cells were grouped based on unsupervised hierarchical clustering.

**Figure 5: scNOME-seq detected characteristic accessibility patterns at CTCF transcription factor binding sites and measured CTCF footprints at individual loci** a) Average GpC methylation level (blue) and CpG methylation level (orange) at CTCF binding sites in GM12878 cells. Regions are centered on motif locations. Shown is the average methylation across a 2 kb window of the pool of 12 GM12878 cells. b) Heatmap displaying the average GpC methylation across CTCF binding sites. Each row corresponds to an individual GM12878 cell and rows are grouped by similarity. c) Schematic outline the measurement of CTCF footprints in accessible regions. M denotes CTCF binding motifs within CTCF ChIP-seq regions and U and D indicate 50 bp upstream and downstream flanking regions. footprint score was determined by subtracting the average GpC methylation in the flanking regions from the GpC methylation at the motif. d) Heatmap displays GpC methylation in accessible regions found in a representative GM12878 cell (GM\_1). Each row represents a single CTCF motif instance within a CTCF ChIP-seq region. Average methylation values for the motif and the 50 bp upstream and downstream regions are shown separately. Regions are sorted based on the footprint score. Displayed are only regions that had sufficient GpC coverage and that were considered accessible based on the methylation status of the flanking regions. e) Heatmap reporting the CTCF motif scores for the motif regions in d). Regions are sorted in the same order as in d). f) Average number of accessible regions at CTCF motifs and the average number of those with a detectable footprint per individual GM12878 cell. Error bars reflect standard deviation. g) Average CTCF motif scores in regions with and without CTCF footprint for all 12 GM12878 cells. Each line connects the two data points from an individual cell h) Combined display of scNOME-seq data from this study and DNase hypersensitivity data, nucleosome occupancy, and CTCF ChIP-seq data from ENCODE. Upper panel shows a ~10 kb region containing a CTCF binding site. DNaseI hypersensitivity data and nucleosome density show characteristic distribution around CTCF binding sites in GM12878 cells. Lower panel shows the GpC methylation data of 5 individual cells that had sequencing coverage in this region, 4 of the cells provide GpC data covering the CTCF motif located in the region. scNOME-seq data tracks show methylation status of individual GpCs. Each row corresponds to data from a single cell. These data indicate that binding of CTCF is detected in all 4 cells. Data are displayed as tracks in the UCSC genome browser (<http://genome.ucsc.edu>).

**Figure 6: Nucleosome phasing in single cells.** a) Average GpC methylation level and b) CpG methylation level at well-positioned nucleosomes in GM12878 cells. Regions are centered on

midpoints of top 5% of positioned nucleosomes. Shown is the average methylation across a 2 kb window of the pool of 12 GM12878 cells. c), d) Correlation coefficients for the comparison in methylation status between GpCs separated by different offset distances for GM12878 (c) and K562 (d) cells. Each line represents a single cell. Data are smoothed for better visualization. e) Distribution of estimated phase lengths for GM12878 and K562 cells. f) Nucleosome phasing in GM12878 in genomic regions associated with different chromatin states defined by chromHMM (ENCODE). Boxplot represents the distribution of estimated phase lengths from all 12 GM12878 cells and overlaid points indicate values of each individual cells.

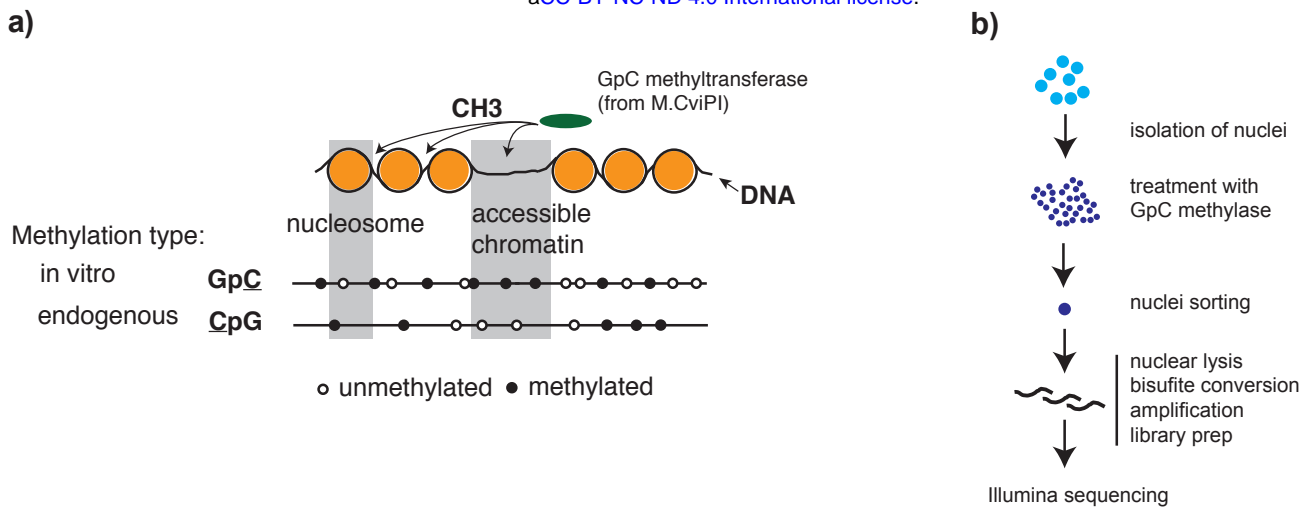

**Figure 2**

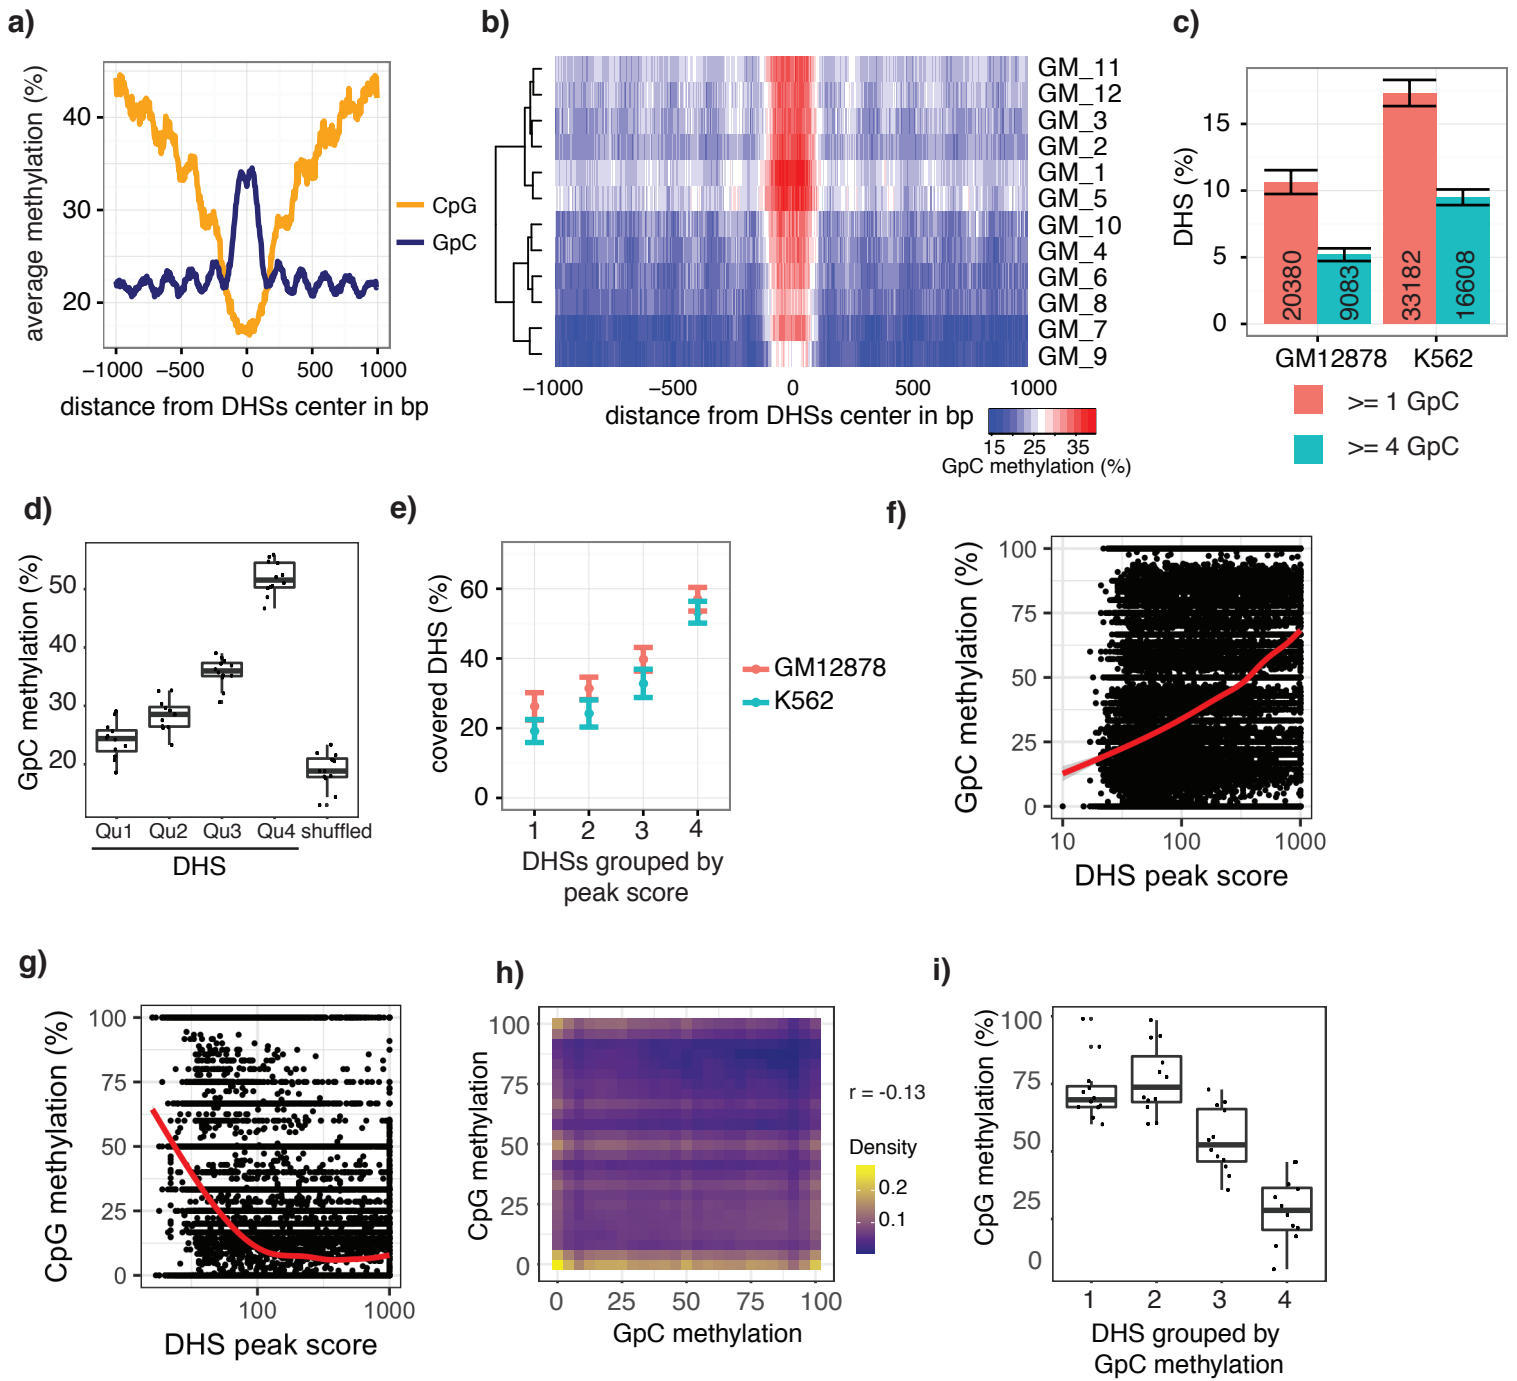

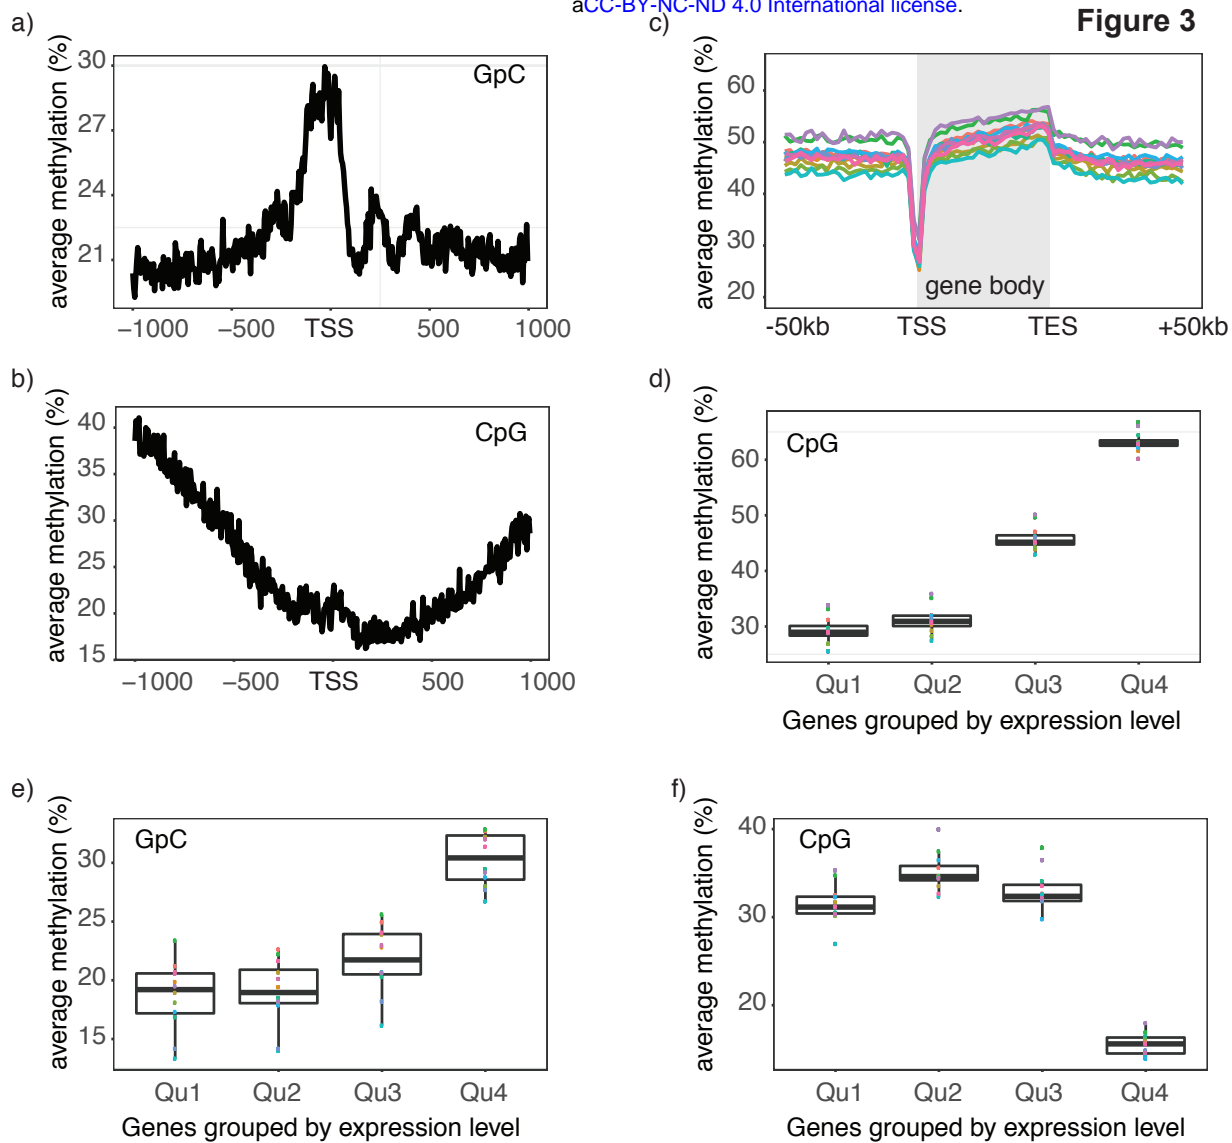

**Figure 4**

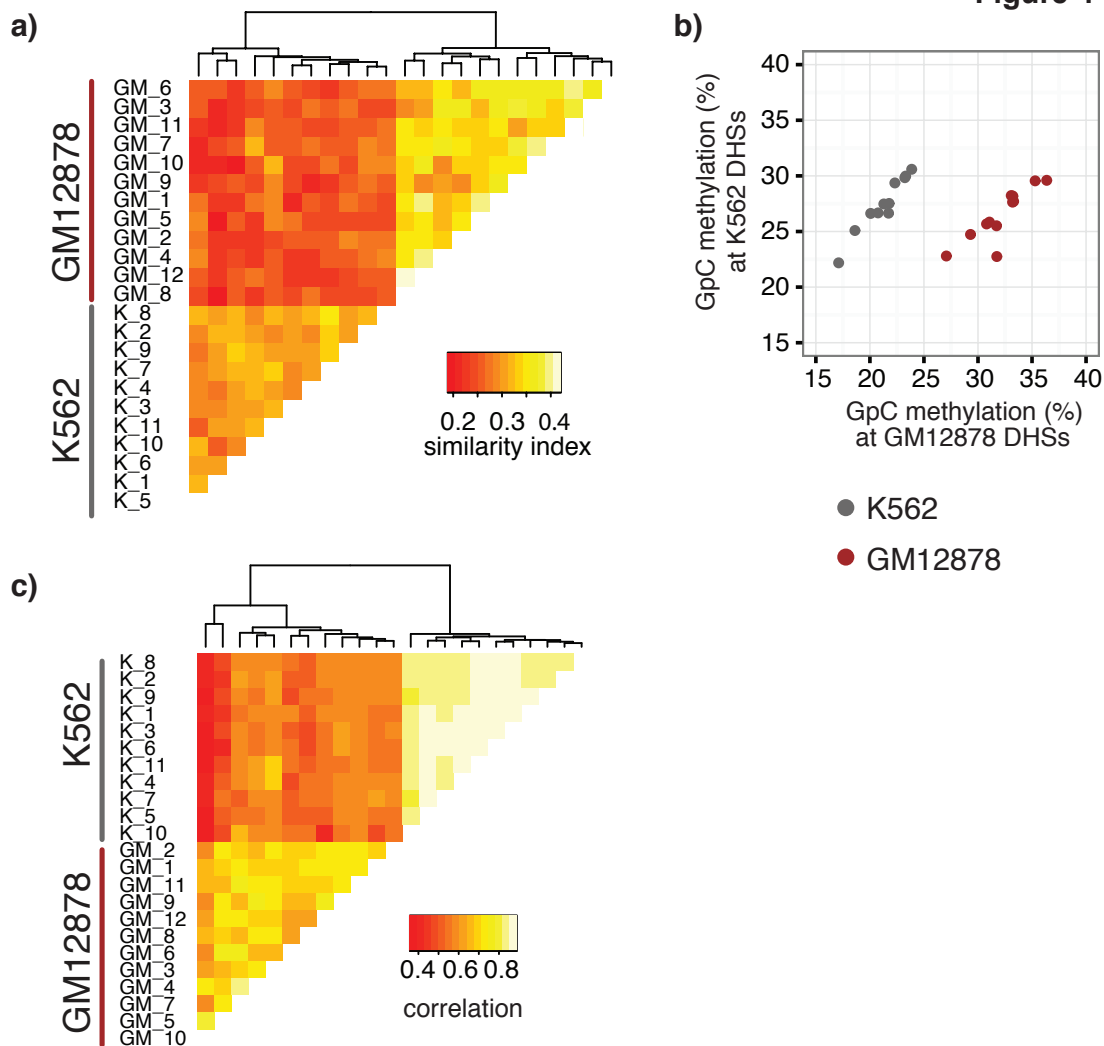

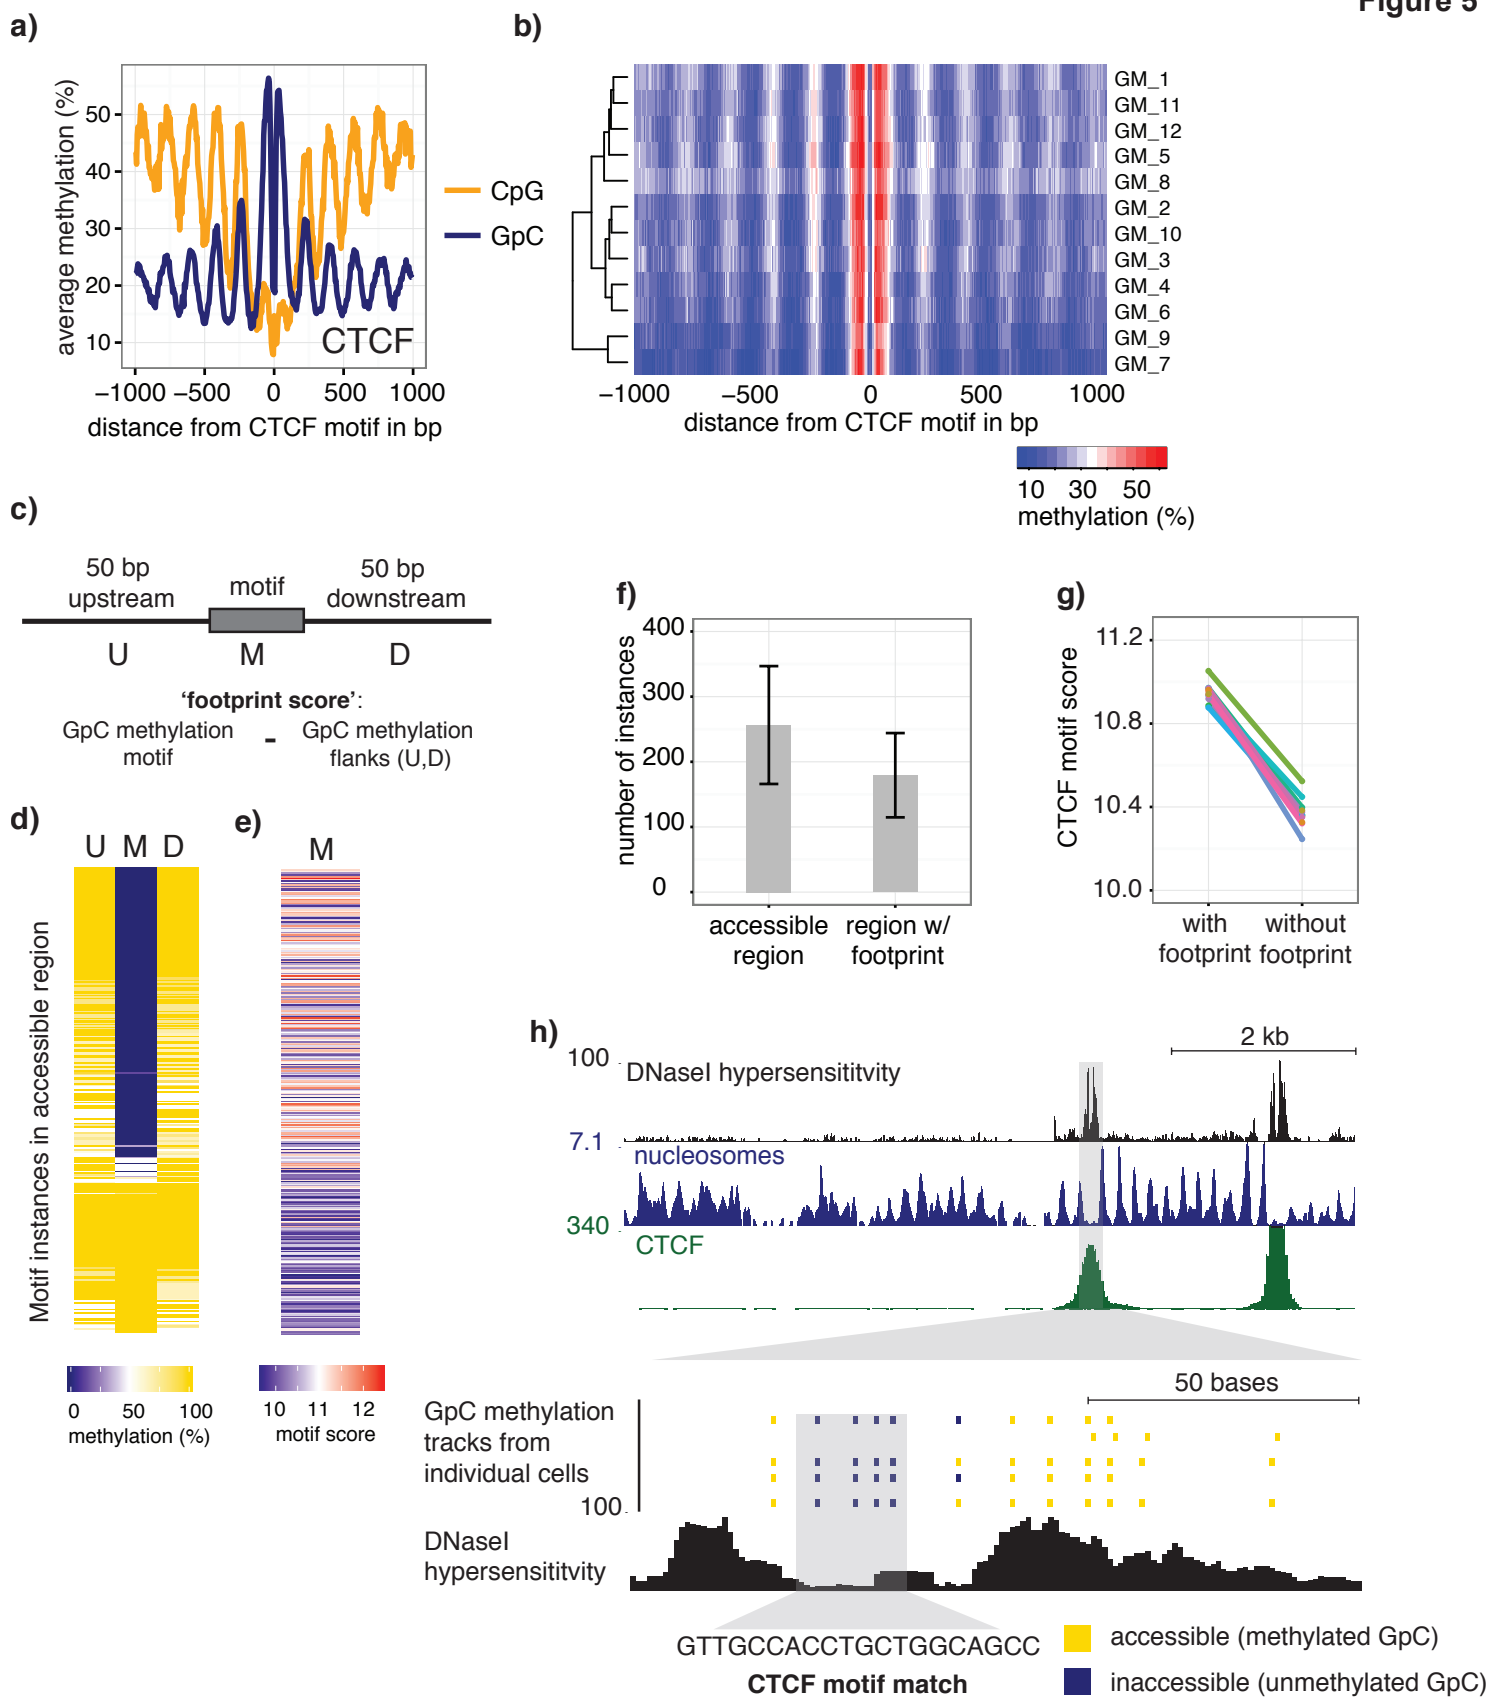



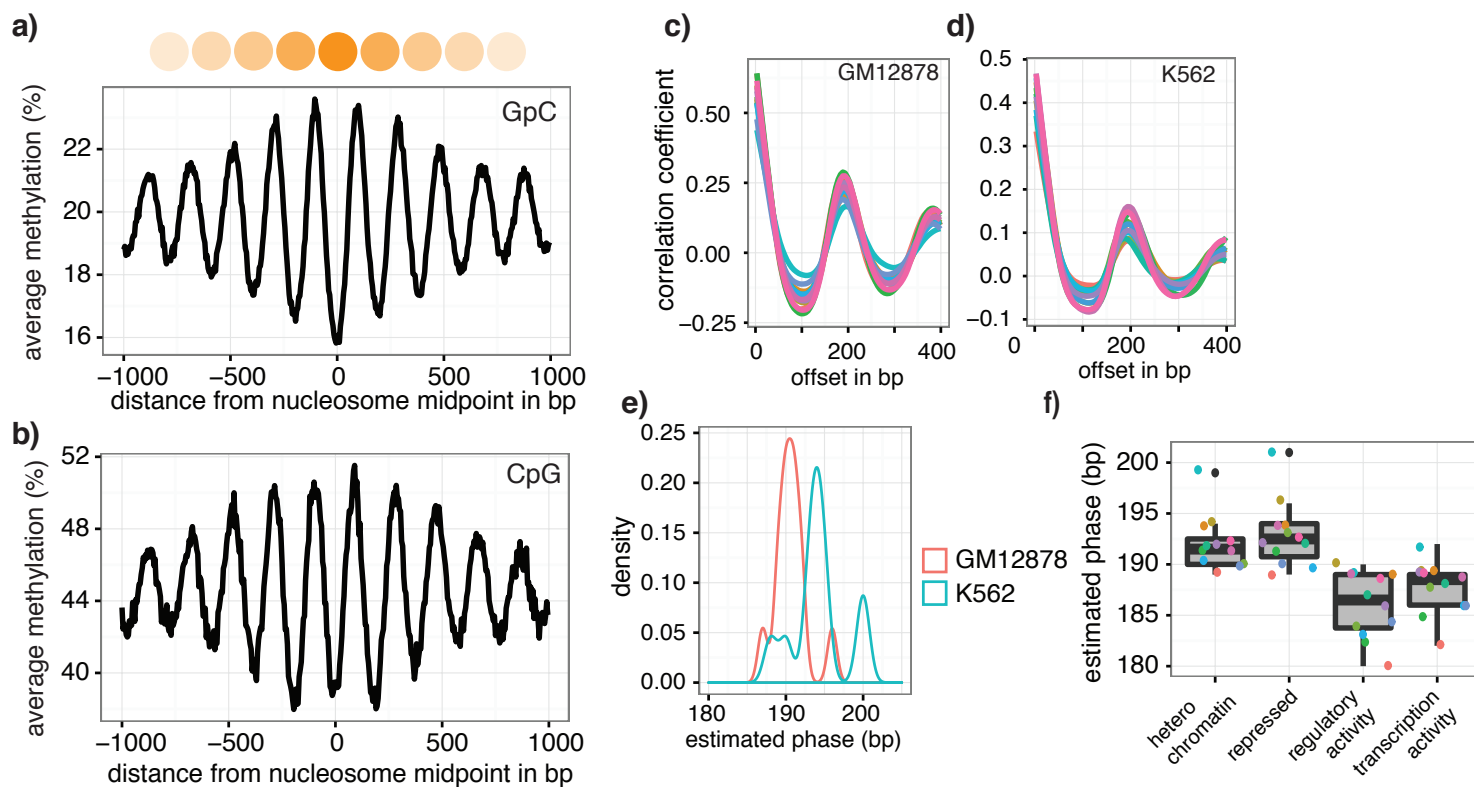

Source: http://www.biorxiv.org/content/10.1101/061739v3.full.pdf
